# Supplementary material for: Combinatorial CRISPR screen reveals FYN and KDM4 as targets for synergistic drug combination for treating triple negative breast cancer
Source: eLife. 2025 Apr 17;13:RP93921. doi: 10.7554/eLife.93921 (PMC12005726; doi:10.7554/eLife.93921)
Supplement: Supplementary file 1. [file elife-93921-supp1.xlsx]

## Sheet: Sheet1
BTK	MERTK	EPHA5
KDR	TYRO3	EPHA6
ABL1	FRK	EPHA7
ALK	FYN	EPHA8
EGFR	HCK	EPHB1
FGFR2	SRC	EPHB2
FGFR3	TXK	EPHB3
IGF1R	CSF1R	EPHB6
JAK2	INSR	TNK1
JAK3	BLK	TNK2
MET	EPHA2	ABL2
FLT3	FGR	PTK6
KIT	ROS1	PTK2
PDGFRB	TYK2	ERBB2
CSK	BMX	ERBB3
RET	DDR1	ERBB4
YES1	WEE1	INSRR
FLT1	EPHB4	LCK
FLT4	ITK	PTK2B
JAK1	FES	MST1R
FGFR1	DDR2	SRMS
FGFR4	EPHA1	TEK
LYN	EPHA10	NTRK1
SYK	EPHA3	NTRK2
PDGFRA	EPHA4	NTRK3
AXL
