# Supplementary material for: Combinatorial CRISPR screen reveals FYN and KDM4 as targets for synergistic drug combination for treating triple negative breast cancer
Source: eLife. 2025 Apr 17;13:RP93921. doi: 10.7554/eLife.93921 (PMC12005726; doi:10.7554/eLife.93921)
Supplement: Supplementary file 2. [file elife-93921-supp2.xlsx]

## Sheet: Sheet1
Gene pairs identified as hits are highlighted in bold
	Relative growth	gene interaction	Z	GI
	Normalized Z	Normalized GI	RIGER log10(p val)	RIGER log10(p val)
FGFR2,PDGFRA	-7.1959	-2.84155	1.46231	4.60033
FYN,ABL2	-8.87645	-2.66408	3.60502	3.62033
FGFR2,EPHA10	-6.27611	-3.41859	0.622148	3.52783
FGFR2,PTK6	-7.05704	-3.3608	0.666553	3.43914
YES1,SRC	-13.0514	-3.94611	5.69897	2.99525
MET,FRK	-3.68296	-1.96657	0.0230085	2.99439
FLT3,FYN	-8.78937	-3.54062	3.60854	2.93592
FRK,BMX	-3.27886	-3.6566	0.0446972	2.92191
CSK,EPHA5	-4.23902	-4.05114	0.119415	2.91973
JAK1,FRK	-6.55692	-3.70129	0.787546	2.80883
BTK,ITK	-5.24425	-4.2191	0.600153	2.80052
ITK,TEK	-6.09158	-3.57826	0.416575	2.72308
TYRO3,FRK	-5.49712	-3.26602	0.202594	2.65758
IGF1R,SRMS	-4.00051	-0.982031	0.0887358	2.64092
ABL1,FRK	-5.40273	-3.3824	1.31921	2.62015
TEK,NTRK1	-5.34841	-2.41033	0.162033	2.60924
SYK,TEK	-5.00545	-2.9222	0.137809	2.58687
ABL2,TEK	-8.57859	-5.04882	1.41851	2.47457
CSF1R,TEK	-4.63955	-3.34271	0.518988	2.46585
FLT4,TEK	-6.07012	-3.20452	0.49026	2.44466
SYK,ABL2	-6.40861	-1.60559	1.20135	2.44249
FGFR2,ERBB2	-6.58267	-3.80549	0.829152	2.41839
FGFR2,SRMS	-4.79456	-2.83839	0.15323	2.41782
ABL1,EPHA5	-4.97174	-2.45273	0.247567	2.38753
FRK,EPHA5	-5.06546	-3.43432	0.19233	2.38753
FGFR2,JAK3	-7.18958	-2.71575	1.0135	2.37789
FRK,NTRK1	-4.9382	-2.17244	0.253677	2.37779
FRK,DDR2	-6.64997	-4.18516	0.968188	2.37716
INSR,EPHA3	-5.02644	-1.14248	0.195315	2.36845
PTK2,PTK2B	-13.5103	-2.47899	7	2.35674
ROS1,EPHA4	-6.24125	-1.51278	1.17836	2.35468
MET,EPHA6	-6.50555	-1.68507	2.17698	2.34785
KDR,MET	-4.3291	-2.8107	0.306889	2.33819
ABL1,PDGFRA	-6.2016	-2.11523	1.16387	2.30417
KDR,ERBB3	-5.04107	-0.261072	0.200659	2.27877
TYK2,TEK	-5.9401	-2.29798	0.607831	2.22098
BTK,LYN	-6.5295	-1.65385	0.990124	2.20586
KDR,TEK	-5.23021	-3.00023	0.212044	2.18977
IGF1R,FYN	-7.55965	-2.69281	1.20873	2.18809
EGFR,FYN	-6.59527	-3.3565	0.549135	2.14231
FYN,TEK	-6.79605	-3.00623	1.31051	2.13829
EPHA4,EPHA5	-4.50625	-2.22932	0.256412	2.10331
JAK1,TYRO3	-5.59852	-1.53691	1.17218	2.0968
PDGFRA,FRK	-6.39186	-2.9934	0.801618	2.0474
ABL1,EPHA4	-4.8279	-2.19777	0.623788	2.03986
KDR,EPHA5	-4.7883	-2.39128	0.358724	2.0318
FRK,EPHA7	-4.63736	-1.7949	0.117191	2.0248
ABL1,TEK	-5.26102	-2.69871	0.346305	2.01991
FGFR2,EPHA8	-4.46925	-1.86932	0.138944	2.01507
TYRO3,TEK	-5.24389	-2.2256	0.108351	2.00798
FGFR2,FGFR4	-6.5895	-3.33343	0.906228	2.00502
EGFR,EPHA5	-4.26461	-2.56552	0.013273	1.97469
FGFR2,JAK1	-6.41745	-2.18195	1.05443	1.96819
EPHA5,MST1R	-6.34788	-1.57752	1.19593	1.96497
HCK,EPHA5	-5.68627	-1.6875	0.455684	1.95861
SYK,EPHA5	-4.42883	-1.8109	0.223371	1.95156
PDGFRA,INSR	-6.0177	-1.59857	0.747875	1.94082
ABL2,ERBB4	-8.09017	-2.19966	1.41465	1.94082
EGFR,ABL2	-6.39062	-2.58281	1.2617	1.92775
LYN,TEK	-7.77594	-2.62919	0.959793	1.92775
ITK,EPHA5	-4.99296	-1.9731	0.228707	1.92409
FLT3,RET	-6.64697	-2.44118	2.18595	1.92191
FGFR2,KIT	-7.18551	-2.22537	1.70863	1.89654
KIT,EPHA4	-5.85042	-1.39731	0.674074	1.86233
EGFR,TEK	-4.78089	-3.52476	0.248798	1.86012
RET,TEK	-5.72994	-3.51502	0.798876	1.85886
FLT3,ITK	-6.73235	-2.2617	1.28912	1.83684
FRK,SRC	-7.56483	-0.99215	2.56495	1.82681
FYN,EPHA8	-5.19339	-1.43281	0.286341	1.81816
KIT,CSF1R	-5.63365	-1.70793	0.614572	1.79452
FGFR2,SRC	-8.93148	-1.41822	3.37069	1.79129
BLK,EPHA5	-4.14312	-1.95476	0.0274269	1.79048
WEE1,PTK2B	-11.4714	-2.38492	4.30803	1.78569
JAK1,ROS1	-8.26722	-2.99541	1.88008	1.78463
BTK,PDGFRA	-4.7543	-1.17238	0.186286	1.78225
EPHA4,NTRK2	-4.13002	-1.37737	0.0333421	1.7812
HCK,SRC	-9.16865	-1.0222	4.25964	1.76802
EPHA4,MST1R	-6.26331	-1.5144	1.39957	1.76095
MET,EPHA5	-3.6577	-1.8425	0.030258	1.7508
KIT,ITK	-6.44058	-1.53082	1.25461	1.74136
FGFR2,EPHA1	-4.97729	-1.46847	0.26512	1.72886
YES1,FRK	-7.31986	-2.52131	0.680062	1.72148
FGFR2,EPHA3	-5.46804	-1.32098	0.237471	1.69832
FYN,DDR2	-6.40746	-1.32697	0.706637	1.69357
JAK2,EPHA5	-4.39817	-1.94545	0.006035	1.69315
FGFR2,FRK	-5.39631	-1.94311	0.301899	1.69058
EPHA2,EPHA6	-4.93034	-0.887014	0.470185	1.6874
CSK,EPHA2	-1.69585	-2.80894	0	1.68719
FRK,EPHA4	-3.89223	-0.928399	0.0311436	1.68487
FES,TEK	-6.80645	-1.9326	2.24795	1.67985
FLT4,CSF1R	-4.50368	-1.96715	0.114639	1.67716
KDR,HCK	-5.6616	-1.31982	0.465847	1.67634
WEE1,TEK	-10.8679	-0.997047	4.27409	1.66194
MET,EPHA4	-3.7099	-2.02178	0.0200876	1.66115
IGF1R,INSRR	-4.54832	-1.1692	0.248644	1.65956
FLT4,EPHA5	-5.17665	-1.96907	0.342657	1.65956
BMX,ERBB4	-4.00414	-1.48553	0.0593341	1.65916
KIT,ABL2	-7.85799	-1.1619	1.82915	1.65758
MERTK,ITK	-6.79769	-1.33657	1.32321	1.65131
IGF1R,ABL2	-6.88298	-0.971924	1.36231	1.6332
HCK,EPHA2	-3.83903	-1.76138	0.36633	1.62197
IGF1R,FRK	-6.02572	-2.87423	0.620694	1.62088
EGFR,HCK	-5.27683	-1.55397	0.445874	1.61907
HCK,BLK	-5.25717	-1.23915	0.353596	1.61852
WEE1,EPHA8	-10.4677	-1.38157	5.22915	1.61565
AXL,EPHA3	-6.28527	-0.892622	1.01341	1.60783
JAK1,NTRK2	-5.00235	-0.995684	0.819587	1.59295
EPHA5,NTRK2	-4.0705	-1.17153	0.012915	1.59108
SRMS,TEK	-3.48351	-1.78553	0.0963133	1.59074
BTK,TYK2	-4.59189	-1.65974	0.158203	1.58956
WEE1,ERBB3	-11.6467	-0.482105	3.29081	1.58104
FGFR2,TNK1	-5.14405	-1.69724	0.205303	1.56992
FGFR3,EPHA5	-4.51924	-2.15996	0.145269	1.56146
INSR,EPHA5	-5.08693	-2.15596	0.404504	1.55956
EPHA1,TEK	-4.33886	-1.85845	0.227019	1.55878
EPHB3,PTK2B	-5.48732	-1.666	0.224972	1.55486
YES1,TEK	-7.3981	-2.42347	1.80939	1.53715
YES1,EPHA4	-6.42142	-1.0329	0.78094	1.53373
DDR1,WEE1	-9.83708	-1.1722	3.91865	1.53373
FGFR2,YES1	-7.69131	-1.60462	1.73993	1.52886
BTK,PTK2	-11.981	-1.07549	6.69897	1.52798
CSK,RET	-3.71424	-1.72576	0.156145	1.52201
FGFR2,ITK	-5.69026	-1.67065	0.390619	1.50696
IGF1R,EPHA5	-4.59742	-0.372008	0.416008	1.50473
TXK,PTK2B	-5.05166	-1.66659	0.15484	1.50473
LYN,MERTK	-8.871	-0.676683	2.42736	1.50086
FYN,EPHA6	-8.40876	-0.770262	3.72216	1.50031
TYK2,ABL2	-6.93874	-0.957969	2.385	1.49336
LYN,AXL	-9.60972	-1.67478	3.12292	1.49336
PTK2,TEK	-12.9079	-1.22007	7	1.48945
KDR,INSR	-5.07048	-1.59142	0.577739	1.48572
TYRO3,BMX	-3.32511	-2.23778	0.0244763	1.48109
BLK,ABL2	-5.90413	-1.42753	1.03499	1.47795
JAK1,ABL2	-7.60257	-2.0102	1.91793	1.47638
YES1,TYRO3	-7.33127	-1.75424	1.23935	1.47392
EPHA5,LCK	-6.33478	-1.46361	0.655019	1.46256
IGF1R,NTRK1	-6.94207	-4.18832	0.81051	1.4583
FYN,PTK2	-14.3044	-1.06912	7	1.44782
FRK,ERBB3	-4.36382	0.479034	0.0442642	1.44745
ITK,MST1R	-6.5712	-1.23846	1.58939	1.44745
EPHA7,TEK	-4.85819	-1.98842	0.0927499	1.44454
RET,TYRO3	-4.77602	-0.980643	0.420559	1.44249
FLT3,TEK	-6.84635	-3.20846	1.1346	1.43676
TYRO3,WEE1	-12.6866	-2.67491	4.55909	1.43545
FGFR4,FRK	-4.33439	-1.12979	0.0252581	1.43192
FGFR2,EPHA6	-8.11509	-1.53121	2.00829	1.43098
KDR,MERTK	-6.5843	-1.42218	1.57479	1.43016
FRK,EPHA6	-7.11436	-1.60111	2.01135	1.42957
JAK2,HCK	-5.3669	-1.12596	0.302509	1.42713
TXK,EPHA5	-5.1986	-0.927219	0.245193	1.41646
KDR,FLT1	-5.60462	-1.99248	0.549597	1.41341
YES1,SYK	-6.7383	-1.37435	0.860121	1.4124
EPHA5,NTRK1	-4.4941	-1.26133	0.221776	1.40627
FYN,NTRK1	-5.94811	-0.920971	1.11447	1.40274
RET,MST1R	-6.58502	-1.49977	1.17496	1.4022
EPHA5,ABL2	-6.18721	-1.38462	1.18802	1.39935
TNK2,TEK	-5.68312	-1.85186	0.989276	1.39523
ITK,NTRK2	-4.6582	-1.26491	0.187087	1.39459
JAK2,FLT4	-4.56242	-0.969629	0.223444	1.39319
IGF1R,FLT3	-5.86554	-0.0809997	0.510182	1.39233
JAK3,BMX	-4.00338	-1.26104	0.0292813	1.39212
HCK,WEE1	-12.7149	-1.42491	6.69897	1.39158
TEK,TEK	-4.77785	-2.42866	0.217241	1.38753
FGFR3,NTRK1	-4.68813	-1.6426	0.124071	1.38394
ROS1,TEK	-6.403	-1.5459	1.36835	1.36633
WEE1,INSRR	-10.6125	-1.34272	3.27165	1.36002
KIT,EPHA5	-5.73133	-1.13142	0.621784	1.35028
JAK3,FRK	-5.60795	-1.60358	0.802444	1.3495
CSF1R,PTK2B	-3.12414	-1.62072	0.006035	1.34132
KIT,BMX	-4.77592	-2.44734	0.943476	1.33115
MERTK,EPHA4	-6.16005	-1.08457	0.810791	1.32818
FYN,MST1R	-7.55559	-0.812201	1.68677	1.3244
EPHA1,MST1R	-5.84414	-1.09813	1.34151	1.31858
KDR,TYK2	-5.37701	-1.29146	0.615647	1.31858
KDR,TYRO3	-4.92735	-1.4602	0.228927	1.31722
SRC,ITK	-8.34899	-1.24401	3.13071	1.3122
EPHA6,TEK	-7.30342	-1.68508	2.1362	1.31131
CSK,MST1R	-5.04844	-0.886234	0.190171	1.30786
SRC,BMX	-6.08628	-1.12031	0.67162	1.30469
BTK,DDR2	-3.9737	-0.937185	0.0712458	1.30426
IGF1R,ITK	-4.83462	-0.0210001	0.42539	1.30268
HCK,TEK	-5.81705	-1.81028	0.628009	1.29843
BMX,PTK2	-10.8057	-0.893151	5.20761	1.29508
KDR,FGFR4	-4.72479	-1.18366	0.145998	1.29482
HCK,EPHB4	-4.89867	-0.925105	0.417028	1.292
EGFR,EPHA4	-3.94648	-1.96943	0.010061	1.29175
WEE1,EPHA6	-14.024	-1.26748	7	1.29056
DDR1,TEK	-3.42456	-2.37418	0.0562582	1.29056
ROS1,EPHA6	-9.13811	-1.08297	2.21567	1.28946
MERTK,ABL2	-7.90936	-0.531864	2.70531	1.28258
PTK2,NegCon	-9.9861	-0.437482	7	1.28166
IGF1R,EPHA6	-7.24077	-0.239765	1.09958	1.27728
SYK,BMX	-3.33675	-3.35121	0.0529586	1.27605
EPHB2,MST1R	-5.75666	-0.909319	0.430158	1.27507
DDR2,EPHA1	-4.51269	-0.958212	0.127378	1.27327
FGFR2,TXK	-6.0668	-1.02304	0.634887	1.27132
CSK,WEE1	-10.7352	-1.90454	2.82391	1.26368
EPHA4,EPHB6	-4.05499	-1.21848	0.0161032	1.26059
LYN,EPHB4	-6.57123	-1.58806	0.564315	1.25775
TXK,PTK6	-6.04708	-0.943517	0.937418	1.25751
KDR,FRK	-4.53982	-1.93037	0.337337	1.25594
YES1,MST1R	-8.30105	-0.562565	2.98088	1.25586
BLK,MST1R	-5.65407	-0.922457	1.03255	1.255
FES,EPHA4	-6.26519	-1.2255	1.31238	1.25259
LYN,FES	-9.07979	-0.861558	3.30356	1.25204
FGFR2,EPHA5	-5.16468	-1.51737	0.921906	1.24177
AXL,PTK2B	-5.23707	-0.920656	0.303818	1.23905
FLT4,WEE1	-12.0005	-1.70425	4.95468	1.23785
BTK,EPHA5	-3.71308	-1.9094	0.041962	1.2371
TYK2,EPHA4	-5.00985	-1.04737	0.380698	1.23366
FLT4,ROS1	-6.56127	-1.04664	1.35942	1.23292
EPHA5,PTK6	-5.02001	-1.17342	0.263603	1.22937
EPHA4,EPHA8	-3.61274	-1.81373	0.0186798	1.22797
ABL1,MERTK	-6.48661	-1.06861	1.35586	1.22614
FRK,CSF1R	-3.95589	-1.97767	0.0400528	1.22373
PDGFRA,EPHA2	-3.38875	-0.915693	0.0917831	1.21997
FGFR4,PTK2B	-4.29692	-2.2614	0.27556	1.2166
FYN,LCK	-7.72408	-0.989053	1.9393	1.20663
FLT3,PTK2B	-4.92112	-0.974242	0.155896	1.20169
FRK,TYK2	-5.13601	-1.26515	0.160899	1.20004
FGFR4,EPHA5	-4.43859	-1.23757	0.0715017	1.19791
FYN,HCK	-6.87455	-0.947088	1.53626	1.19396
HCK,CSF1R	-5.05436	-1.2224	0.337714	1.19226
FRK,FRK	-4.75722	-2.62317	0.342084	1.18442
ITK,EPHA7	-4.69755	-0.793335	0.182501	1.18158
EPHB4,ABL2	-5.87064	-1.6284	0.711974	1.17796
FLT1,INSR	-5.16355	-0.898414	0.519418	1.17672
CSK,FRK	-3.11343	-1.30261	0.0351749	1.17633
FGFR1,DDR1	-2.38554	-1.40633	0	1.17574
ITK,PTK2B	-3.69412	-0.728882	0.0259491	1.17509
BTK,EPHA4	-3.40283	-1.23748	0.0099721	1.17095
EPHB3,NegCon	-3.50907	-0.547558	0.00305075	1.17076
FRK,ERBB4	-5.32752	-1.08422	0.63865	1.17012
JAK1,EPHA5	-5.15841	-1.29974	0.324038	1.1633
BTK,FLT3	-5.23645	-1.55214	0.632458	1.16285
EPHA5,NTRK3	-3.88995	-1.24101	0.0293742	1.16279
LYN,ITK	-7.35738	-1.21626	1.77211	1.16254
BTK,FGFR2	-4.72605	-2.30255	0.122629	1.16184
FRK,TNK2	-4.97315	-0.795114	0.593119	1.16172
FGFR1,INSRR	-3.20066	-1.61943	0.00687252	1.16128
EPHB4,EPHA8	-3.06254	-1.54702	0.0171411	1.16121
LYN,MST1R	-8.7424	-0.723202	3.7597	1.15939
FRK,EPHB1	-4.05043	-1.21138	0.0775341	1.1567
EPHA4,NTRK1	-4.29769	-0.908191	0.0946359	1.15323
TYRO3,EPHA6	-7.14162	-0.908975	2.17431	1.15286
EPHA1,NTRK2	-3.86188	-1.10081	0.0107282	1.15212
BLK,ITK	-4.22362	-1.19569	0.0664115	1.15181
FGFR3,TYRO3	-4.44171	-1.1474	0.135192	1.15083
FGFR2,EPHB4	-4.51004	-1.26569	0.456056	1.15046
FYN,PTK2B	-5.34107	-1.54417	0.194771	1.15015
BTK,ABL1	-3.75755	-1.20973	0.102208	1.14972
FLT3,TYRO3	-5.9397	-1.206	0.49812	1.1485
ABL1,WEE1	-10.7353	-0.616946	4.71444	1.13602
RET,FYN	-6.27566	-1.59229	1.44093	1.12954
EPHA5,EPHA8	-3.58561	-1.70412	0.0185438	1.12744
RET,HCK	-5.7012	-1.12486	1.24764	1.1268
IGF1R,MERTK	-7.36387	-1.38456	1.46382	1.12419
EGFR,JAK3	-5.02527	-1.0837	0.314975	1.12171
FLT3,PTK2	-13.3441	-0.275291	7	1.12027
FLT4,AXL	-6.68527	-1.28538	0.974694	1.1197
YES1,BMX	-5.23342	-1.43372	0.342848	1.11919
FGFR2,BMX	-3.53799	-1.60722	0.0468688	1.11719
EPHA6,PTK2B	-6.22877	-1.1339	0.673255	1.11594
INSR,EPHA4	-4.67681	-1.51943	0.159141	1.11549
FGFR2,DDR1	-3.51313	-0.736919	0.00731396	1.11306
KIT,EPHB6	-5.97148	-1.5296	0.471726	1.11171
FLT4,EPHB3	-6.09762	-0.846856	0.860751	1.11098
RET,YES1	-6.73619	-0.910521	1.11571	1.10991
DDR2,ABL2	-6.4662	-0.732289	1.35096	1.10818
YES1,CSF1R	-6.08035	-1.13997	0.513711	1.10807
FGFR2,ROS1	-6.4204	-0.42114	1.17895	1.10768
CSK,ROS1	-4.86919	-0.618134	0.189297	1.10425
FLT3,ABL2	-7.43716	-0.885545	2.36121	1.10331
KDR,CSF1R	-4.0345	-1.68277	0.219539	1.09593
FRK,NTRK3	-3.63591	-0.765274	0.0160581	1.09055
IGF1R,ERBB4	-5.82555	-0.317102	0.616185	1.08391
FRK,FES	-6.4323	-1.50468	0.804377	1.08318
EPHA5,EPHB6	-4.30143	-1.6306	0.222066	1.08228
WEE1,EPHA5	-10.7653	-0.992807	2.93704	1.08186
EPHA4,EPHB2	-3.67905	-0.778423	0.0512448	1.08166
IGF1R,EPHB3	-7.27059	-2.16764	0.732125	1.08134
KDR,ITK	-4.64997	-0.860016	0.212327	1.07764
FGFR3,EPHA7	-4.01331	-0.501826	0.0863451	1.07541
FGFR1,EPHA4	-3.52331	-1.13337	0.00344455	1.07391
PDGFRA,EPHA1	-5.07161	-0.912701	0.350081	1.0713
EPHA5,ERBB3	-4.3253	0.601469	0.0596828	1.07022
KIT,WEE1	-13.3633	-1.69568	4.80967	1.06915
SRC,NegCon	-5.38233	-0.605587	0.592779	1.06814
SRC,EPHB6	-7.5123	-0.897308	1.94692	1.06778
SYK,TYRO3	-4.44138	-0.908839	0.100891	1.06742
TXK,TEK	-5.29469	-1.0078	0.638839	1.06601
AXL,ABL2	-7.83967	-0.807634	1.86391	1.0656
EPHB4,EPHA1	-3.36587	-0.951533	0.0081097	1.06293
DDR1,NTRK2	-2.74459	-0.800928	0.000782434	1.06163
WEE1,ITK	-11.7145	-1.5386	3.51684	1.05953
EPHA10,TEK	-4.1659	-1.29844	0.112326	1.05909
CSF1R,ITK	-4.48385	-1.99825	0.19321	1.0574
KDR,NTRK1	-4.71521	-1.1021	0.225629	1.0568
YES1,INSR	-6.66398	-0.625085	1.25493	1.05527
EPHA4,NTRK3	-3.79351	-1.09375	0.0105057	1.05443
RET,EPHA6	-7.18226	-1.0849	1.71265	1.05144
AXL,EPHA5	-6.31883	-1.64796	1.6178	1.05002
FLT1,EPHA3	-5.03648	-0.711552	0.703335	1.04988
IGF1R,EPHB6	-4.6098	-0.376469	0.248336	1.04798
EPHA2,ERBB4	-3.40132	-0.820889	0.0360706	1.04697
FRK,WEE1	-11.5763	-1.8873	4.08249	1.04672
ABL1,ALK	-4.48108	-1.81262	0.221487	1.04417
EPHA3,ABL2	-6.11515	-0.568246	0.692076	1.04321
EPHA3,EPHA6	-7.02248	-0.683202	1.64512	1.04268
FRK,INSR	-4.31165	-0.819731	0.0231917	1.0423
FRK,MST1R	-5.76105	-0.694344	1.48479	1.04034
FGFR2,ABL2	-7.23296	-1.74873	1.15335	1.03996
BTK,INSR	-4.08165	-1.68696	0.122053	1.03962
TYK2,NTRK2	-4.73724	-0.522024	0.188827	1.0365
FGFR4,MST1R	-6.34292	-1.04696	0.924453	1.03405
KDR,EPHA3	-4.85336	-1.23759	0.13537	1.03348
ALK,ITK	-4.06996	-0.608641	0.0339522	1.02821
JAK3,TEK	-5.63169	-1.35288	1.0654	1.02581
INSR,ABL2	-6.52807	-1.22819	1.39545	1.0254
TNK2,ABL2	-7.0284	-0.957001	1.52974	1.02526
FLT4,BMX	-3.19701	-1.43567	0.019315	1.02457
BTK,EGFR	-3.12883	-1.65111	0.0207704	1.0226
INSR,PTK2B	-3.58406	-0.518952	0.110026	1.02068
EGFR,FLT4	-3.97151	-0.739023	0.0268721	1.02018
EPHA3,EPHA5	-4.50973	-1.17327	0.320481	1.01768
CSK,TYRO3	-3.5523	-1.17967	0.0172314	1.01565
IGF1R,EPHA4	-4.16824	0.316783	0.0285386	1.01426
CSF1R,ROS1	-5.46389	-0.960803	0.666956	1.01426
CSF1R,EPHA3	-3.88133	-0.860634	0.188023	1.01256
FLT1,EPHA4	-4.76735	-0.961138	0.416575	1.01068
ABL1,EPHA1	-4.2052	-1.21153	0.549443	1.00935
KDR,DDR2	-4.6714	-0.560262	0.320754	1.00736
FRK,PTK6	-4.94971	-1.12292	0.105352	1.00648
ALK,INSR	-4.06811	-0.615183	0.177178	1.00502
FGFR1,INSR	-3.71705	-0.582492	0.0787819	1.00428
ALK,EPHA4	-3.58401	-0.57296	0.0166444	1.00401
EGFR,EPHA6	-6.32491	-1.035	0.806041	1
BMX,MST1R	-4.61847	-1.19395	0.116452	0.998699
ABL1,EGFR	-3.99079	-1.22316	0.0498787	0.998266
BTK,INSRR	-2.89192	-1.1706	0.0301184	0.997834
HCK,ERBB3	-5.28772	1.08075	0.275478	0.997402
HCK,FES	-7.41112	-0.787872	3.10237	0.997402
CSF1R,NTRK1	-3.83364	-0.813221	0.0397671	0.997402
WEE1,ERBB2	-11.0686	-1.28334	3.4176	0.996539
FLT4,ITK	-4.77312	-0.486084	0.152921	0.995249
PDGFRA,ITK	-5.89074	-1.35896	0.56655	0.995249
TYRO3,EPHA1	-4.09718	-0.848512	0.0303512	0.993106
EPHA6,ABL2	-9.01026	-0.973207	3.74497	0.991826
SYK,SYK	-4.60839	-2.05912	0.171727	0.989276
EPHB6,ABL2	-6.07663	-1.18511	0.787546	0.988853
MST1R,NTRK1	-6.08508	-0.544708	0.802719	0.98843
ABL1,FLT4	-4.86052	-0.879316	0.395234	0.983384
CSF1R,DDR2	-4.13076	-0.947166	0.0391488	0.983384
FLT4,LYN	-7.26904	-0.960095	1.95664	0.980884
RET,EPHA4	-4.37411	-1.26407	0.992679	0.979639
ABL1,AXL	-6.24957	-1.07825	1.07904	0.978397
RET,ITK	-4.82965	-0.950125	1.28651	0.977572
CSK,FLT4	-3.71263	-1.19462	0.0499761	0.976748
FRK,EPHA8	-3.75489	-2.12451	0.280006	0.976748
ITK,EPHA4	-4.29743	-0.751549	0.041245	0.976336
FGFR4,NTRK2	-4.17279	-0.651433	0.0780535	0.973467
ITK,PTK2	-12.1903	-0.215189	7	0.97265
CSF1R,ERBB3	-3.56002	1.16419	0.019633	0.971022
ITK,EPHA3	-4.92239	-0.993751	0.197226	0.971022
SYK,ITK	-4.63471	-1.09839	0.274824	0.971022
FLT3,AXL	-7.56426	-1.07552	2.65463	0.970211
EPHB3,MST1R	-7.12378	-0.213418	1.68529	0.969805
PTK6,TEK	-4.84867	-0.792444	0.181708	0.9694
FGFR3,ITK	-4.23069	-0.586055	0.403403	0.968188
FLT4,FRK	-4.87595	-1.48754	0.250418	0.967381
CSF1R,EPHA6	-6.35321	-1.10961	0.876475	0.966576
EGFR,PDGFRB	-4.46677	-0.768071	0.293624	0.96138
EGFR,ERBB4	-4.77307	-0.74096	0.15484	0.960983
FRK,TEK	-4.10498	-1.1408	0.163296	0.959793
BTK,CSK	-2.68774	-2.21663	0.0328734	0.959398
EPHA10,ABL2	-5.82116	-0.954339	0.946154	0.959002
PDGFRB,FYN	-6.24208	-0.460258	1.29192	0.958213
KDR,ROS1	-5.94934	-0.635708	0.66334	0.958213
ALK,PDGFRA	-4.82712	-0.524702	0.20866	0.957424
MST1R,NTRK2	-5.74771	-0.59312	0.807154	0.957424
IGF1R,HCK	-5.83238	-0.330374	0.616185	0.956638
EPHA4,ABL2	-6.03459	-1.20954	1.75597	0.955852
EPHA2,EPHA5	-2.35446	-1.7918	0.000260655	0.954677
HCK,ITK	-6.01301	-1.48438	0.856985	0.952725
KDR,BMX	-2.89044	-1.58621	0.038484	0.951558
FGFR4,FYN	-6.0015	-1.05708	0.544546	0.949234
FGFR2,TNK2	-6.05529	-1.43822	0.639407	0.947691
EPHA2,ABL2	-4.35486	-1.54949	0.398701	0.946922
MET,FYN	-4.56107	-0.339663	0.238749	0.94424
IGF1R,INSR	-5.1292	-0.566196	0.444664	0.94424
MST1R,TEK	-6.42247	-1.57537	1.12263	0.943858
BTK,JAK1	-4.20154	-0.912222	0.143573	0.943476
TYRO3,ERBB4	-5.58223	-0.815324	0.834756	0.940815
BMX,WEE1	-9.75726	-1.43479	3.37882	0.940058
MERTK,NegCon	-4.02144	-0.569318	0.26496	0.938171
CSK,EPHA6	-5.84546	-1.06981	1.04571	0.936291
AXL,FES	-7.89806	-0.506417	2.29964	0.935917
EPHA4,TEK	-4.21826	-1.36792	0.113396	0.934047
JAK1,PTK2B	-4.11944	-0.630839	0.0701725	0.932929
HCK,EPHA8	-4.46077	-0.622883	0.150028	0.929962
EPHA5,EPHB2	-3.71192	-0.767229	0.0503661	0.929593
ALK,MERTK	-5.82197	-0.714217	0.465466	0.928486
BTK,BLK	-3.10731	-1.16905	0.00222057	0.926282
SRC,ROS1	-9.45771	-0.671845	4.52143	0.924453
EPHA6,TNK1	-6.5874	-0.967674	1.71942	0.924453
ROS1,WEE1	-12.8265	-0.916934	5.65758	0.922996
EPHA6,NegCon	-4.64894	-0.52872	0.223008	0.922269
MET,INSR	-3.49474	-0.452158	0.0156978	0.920096
ABL1,INSRR	-3.74084	-0.85411	0.05611	0.920096
RET,WEE1	-11.0415	-0.928522	4.44855	0.919374
FGFR2,FGFR1	-4.20708	-0.901347	0.172566	0.918653
IGF1R,DDR1	-4.02592	-1.53013	0.534617	0.918653
FES,EPHA5	-6.09851	-0.917549	1.0052	0.916497
EPHB1,TEK	-4.0463	-1.03118	0.0187705	0.916497
EGFR,MET	-3.08687	-1.62344	0.00762324	0.916497
EPHA2,PTK6	-2.85873	-0.665626	0.00326948	0.915424
EPHA4,PTK2	-12.0259	-0.515105	7	0.915066
CSF1R,DDR1	-2.33301	-1.04538	0.004014	0.914353
FGFR2,FGFR3	-5.08207	-1.43088	0.278519	0.912219
FYN,EPHA5	-5.56961	-0.980882	0.67162	0.911864
KDR,SYK	-4.24051	-0.978646	0.0474013	0.91151
FGFR3,FYN	-5.53251	-0.930671	0.315514	0.910802
IGF1R,ROS1	-5.76027	0.782295	0.769551	0.908685
FGFR1,EPHA5	-3.50886	-1.07992	0.000869459	0.907982
MERTK,TEK	-6.32425	-1.16374	0.924088	0.906578
JAK2,PDGFRA	-4.96227	-0.574957	0.372737	0.906228
FLT3,CSF1R	-5.05854	-0.932081	0.653256	0.904482
EGFR,BLK	-3.4243	-1.34479	0.039339	0.90101
FYN,FGR	-5.50143	-0.294778	0.50724	0.899629
CSK,EPHB3	-4.55328	-0.634718	0.34785	0.899629
EPHA5,EPHA7	-4.06204	-0.600087	0.0165993	0.899285
INSR,FES	-6.30521	-0.508879	1.11999	0.896538
PDGFRA,MERTK	-7.3148	-0.812651	2.00975	0.895513
IGF1R,EPHA8	-3.75061	-0.0223818	0.17993	0.895172
FLT4,EPHA3	-4.87427	-0.693043	0.577574	0.895172
FRK,ITK	-4.35361	-0.862367	0.0617806	0.894831
RET,EPHB4	-3.94498	-1.06015	0.103088	0.894831
FLT3,NegCon	-3.37399	-0.551579	0.00943917	0.894149
TYRO3,EPHA5	-4.51307	-1.29768	0.104743	0.894149
FGFR2,IGF1R	-6.29604	-2.01092	0.982549	0.893809
DDR1,MST1R	-4.70146	-0.672164	0.527097	0.893469
KDR,LYN	-6.74148	-0.682868	1.42922	0.893469
SYK,PTK2B	-3.67573	-1.46893	0.21261	0.89279
ABL1,ITK	-4.9249	-1.17502	0.376027	0.889747
ALK,SRC	-7.55305	-1.18148	1.5476	0.889747
JAK2,FYN	-5.39747	-0.742681	0.678816	0.889074
ABL1,EPHA3	-4.72462	-0.865929	1.05493	0.888737
FRK,EPHA2	-2.10426	-1.05862	4.34316e-05	0.888737
EGFR,EGFR	-3.14134	-1.13497	0.105961	0.888737
EGFR,TYK2	-4.59148	-0.99585	0.211054	0.887395
MET,HCK	-4.5452	-0.755085	0.158453	0.886725
KIT,FLT4	-6.05007	-0.708226	1.62801	0.885056
JAK1,HCK	-6.03081	-0.679779	1.2594	0.883724
KDR,PDGFRA	-5.47647	-1.09798	0.347367	0.882397
BTK,ROS1	-5.27615	-0.954611	0.250418	0.882066
FRK,ABL2	-6.10211	-1.33169	0.840734	0.880744
HCK,NTRK2	-5.2842	-0.987433	0.255551	0.880414
FGFR2,TEK	-4.96687	-1.06501	0.646084	0.879426
KIT,LYN	-8.40107	-0.746386	2.50238	0.877456
TNK1,PTK6	-4.56277	-0.65983	0.0882034	0.876802
FGFR2,DDR2	-5.89634	-1.77416	0.493224	0.874844
IGF1R,SRC	-8.19717	-0.433324	1.68613	0.874519
FLT4,EPHA10	-4.38944	-0.675361	0.330683	0.873544
TXK,BMX	-3.55711	-0.695815	0.0622314	0.870955
FLT4,TNK1	-4.46394	-1.11117	0.285503	0.870955
JAK1,DDR2	-5.69834	-1.13681	0.529443	0.870632
FRK,TXK	-5.45072	-1.41484	0.340654	0.869988
YES1,HCK	-7.77016	-0.888553	1.34199	0.869023
EPHB2,TEK	-3.76698	-0.67464	0.216811	0.866461
FGFR3,INSR	-4.52048	-1.14141	0.44721	0.865823
BTK,ABL2	-5.3698	-1.14127	0.798876	0.865186
FLT3,FGFR1	-5.01971	-0.999329	0.323672	0.861697
INSR,NTRK2	-4.32305	-0.70274	0.0853396	0.860121
FGFR3,SRC	-7.51541	-0.9046	1.87095	0.85855
FGFR3,WEE1	-10.9955	-1.24967	3.80549	0.85855
WEE1,ERBB4	-12.788	-1.49478	5.0655	0.85855
IGF1R,FGFR1	-4.25488	-0.674322	0.23448	0.856049
FLT3,TYK2	-6.09993	-0.403768	1.16685	0.854804
KIT,EPHA2	-3.88441	-1.10476	0.506681	0.854804
IGF1R,CSK	-3.71567	-0.416275	0.111821	0.854182
JAK2,INSRR	-3.38585	-0.826213	0.00379489	0.850165
FLT3,ROS1	-6.97381	-0.209692	0.892112	0.849244
JAK2,MERTK	-5.81597	-0.534981	1.16109	0.84863
EPHB4,ERBB4	-4.53743	-0.345771	0.249492	0.848324
CSF1R,EPHA4	-3.36669	-0.709574	0.0101054	0.846795
PDGFRB,EPHA4	-4.77379	-0.626289	0.40927	0.84649
EPHA5,PTK2	-12.219	-0.662609	7	0.846185
BTK,EPHA2	-1.51552	-1.38956	8.68676e-05	0.842241
FRK,EPHB4	-3.67457	-1.33623	0.0322649	0.841939
ITK,EPHB6	-4.30915	-0.660345	0.158203	0.841336
RET,JAK1	-4.96069	-0.425456	0.859178	0.840132
JAK3,YES1	-7.81574	-0.864458	2.18735	0.839832
PDGFRB,EPHA3	-5.13772	-0.54044	0.297311	0.837436
LYN,NegCon	-4.59424	-0.502717	0.100836	0.837137
SYK,PDGFRA	-5.24613	-0.934562	0.301117	0.837137
FRK,PTK2	-11.7615	-0.278163	7	0.836839
BTK,KDR	-3.59474	-1.09551	0.0230085	0.834756
INSRR,PTK2B	-2.74968	-0.755826	0.0070049	0.83357
EPHA5,INSRR	-3.4398	-0.886108	0.00270101	0.83357
ABL1,FGFR2	-4.83975	-0.477318	0.169027	0.830326
ABL2,NegCon	-3.83031	-0.56001	0.00674017	0.827105
ABL1,JAK2	-4.16918	-0.832567	0.121881	0.827105
KIT,PTK2	-13.735	-0.472384	7	0.826231
EGFR,RET	-3.92574	-1.06826	0.477165	0.824488
PDGFRA,EPHA7	-5.29482	-0.580618	0.510042	0.821887
EPHB6,TEK	-4.16666	-1.2855	0.549135	0.821887
FLT4,INSR	-4.7782	-0.512149	0.271809	0.821599
INSR,EPHB4	-3.91933	-0.792422	0.149783	0.821599
PDGFRA,BLK	-4.91332	-0.833645	0.592099	0.819301
DDR2,EPHA8	-3.87545	-0.78983	0.0798767	0.818728
SRC,EPHA5	-7.42409	-0.793088	2.19641	0.8173
FES,NegCon	-4.04323	-0.583704	0.115205	0.815877
FGFR1,NTRK2	-3.29223	-0.588215	0.00239521	0.815025
EPHA5,ERBB4	-5.11034	-0.678702	0.228339	0.815025
EPHA1,PTK2B	-3.06447	-0.719496	0.00585889	0.814741
FLT1,FYN	-6.28493	-0.905666	0.729554	0.813326
EPHA2,WEE1	-8.55974	-0.561417	1.99183	0.812479
CSF1R,INSRR	-3.05358	-1.12	0.0231459	0.811634
PTK6,NegCon	-2.73268	-0.500526	8.68676e-05	0.811353
YES1,EPHA6	-8.92113	-0.374037	3.21481	0.809949
EGFR,FLT3	-4.89039	-0.62731	0.598944	0.809388
ERBB3,MST1R	-5.87608	1.08205	0.990974	0.808549
JAK3,SYK	-5.11572	-0.453665	0.498667	0.80827
TXK,EPHA1	-4.86422	-0.606158	0.28693	0.80799
JAK3,FYN	-7.04428	-1.06943	1.08323	0.807711
PDGFRA,EPHA6	-7.70184	-0.389817	2.21417	0.807154
EPHA4,SRMS	-2.80559	-0.492635	0.00191511	0.805763
MET,PDGFRA	-4.39807	-0.642469	0.0953926	0.805486
FGFR2,FES	-6.77303	-0.664387	1.50598	0.805486
BLK,EPHA4	-3.56109	-0.736138	0.00117418	0.801893
EGFR,NegCon	-1.44677	-0.333546	0	0.801618
EPHA4,ERBB4	-5.00556	-0.528201	0.208029	0.801343
CSK,ERBB3	-3.37863	0.904312	0.433798	0.799697
EPHA8,ABL2	-4.8859	-0.325003	0.196748	0.799697
MET,FLT3	-4.74389	-0.777385	0.225994	0.797239
CSK,ERBB4	-4.34222	-0.962114	0.174899	0.796423
JAK2,EPHA6	-6.48566	-0.607684	0.997834	0.79588
MET,WEE1	-9.9364	-0.825394	2.84497	0.795337
PDGFRB,EPHA5	-4.83268	-0.686379	0.315873	0.794796
LYN,BLK	-6.0987	-0.441542	1.64207	0.794525
FRK,BLK	-3.53856	-0.693631	0.0262258	0.794525
SYK,DDR1	-2.88255	-1.02731	0.00121773	0.793714
FYN,TYK2	-6.41378	-0.752748	0.990974	0.792635
FLT4,EPHB1	-4.36304	-0.555999	0.223081	0.791827
ROS1,EPHB3	-7.26823	-0.411909	1.67428	0.791559
YES1,EPHA5	-6.35976	-0.891154	0.763211	0.790217
SRC,DDR1	-6.03248	-0.475816	1.01619	0.789681
BLK,EPHA1	-3.45361	-0.806839	0.004014	0.789147
FGR,EPHA4	-4.16603	-0.811177	0.0115302	0.789147
CSK,DDR2	-3.69449	-0.95237	0.0745332	0.788346
KDR,ABL1	-4.42467	-0.718134	0.144299	0.787546
SRC,ABL2	-9.37843	-0.608755	3.93855	0.784098
INSR,DDR2	-4.99458	-0.7505	0.23381	0.783306
BMX,TNK2	-3.61994	-1.14972	0.123493	0.783306
FLT3,EPHA5	-5.59803	-1.22456	0.585361	0.78199
PDGFRA,MST1R	-7.35023	-1.15762	1.46623	0.781727
EPHB4,INSRR	-2.95692	-0.740071	0.0228711	0.78094
WEE1,EPHA4	-10.5007	-0.746552	4.33161	0.78094
FGFR3,TNK2	-4.71595	-0.354377	0.417142	0.780677
FRK,EPHB3	-5.54488	-0.929618	0.492549	0.779892
SYK,PTK6	-4.90631	-0.936125	0.190036	0.779892
FLT4,SRC	-7.73955	-0.35675	3.69637	0.779369
FLT1,TEK	-4.96584	-1.0784	0.142065	0.779369
BTK,SRC	-6.58504	-0.599097	1.47006	0.779108
FLT4,FGFR4	-4.44295	-0.110128	0.105961	0.777024
TYRO3,NTRK2	-4.42085	-1.06878	0.0887358	0.773916
FGFR3,TEK	-4.02065	-0.95078	0.232325	0.7734
EGFR,EPHA8	-2.75605	-0.779019	0.0517827	0.771087
YES1,ITK	-6.69609	-0.667904	0.954286	0.77083
KDR,IGF1R	-6.41017	-3.14388	0.747632	0.769296
DDR1,EPHA6	-5.44435	-0.696218	0.658961	0.768785
FLT3,MERTK	-7.05668	-0.0936301	1.54166	0.768276
FLT1,FLT4	-5.08845	-0.628505	0.665144	0.768021
PDGFRA,EPHA10	-4.87181	-0.42457	0.213249	0.767004
BTK,FES	-5.21688	-0.512022	0.399136	0.767004
JAK3,ITK	-6.002	-1.36719	0.692504	0.76675
AXL,BMX	-4.47112	-1.04869	0.377993	0.765736
HCK,DDR1	-4.0638	-0.91186	0.0673741	0.763211
FLT4,FES	-6.50355	-0.62444	1.89963	0.760951
ALK,MST1R	-5.82113	-1.01807	0.444664	0.760701
YES1,TNK1	-6.14891	-0.844093	0.655608	0.758952
WEE1,PTK2	-19.4698	-0.995173	7	0.758703
BTK,EPHA3	-3.64357	-0.749424	0.0471591	0.756962
FGFR1,FGFR4	-3.75269	-0.842391	0.0600317	0.756962
BMX,ABL2	-4.28552	-0.685964	0.241618	0.756714
HCK,EPHA6	-7.87407	-0.511556	2.27605	0.755723
AXL,WEE1	-12.1945	-0.357042	7	0.755228
ABL2,LCK	-7.54424	-0.249919	1.93629	0.753748
TEK,NTRK3	-3.88397	-0.998625	0.0456128	0.751536
FGFR2,NTRK2	-4.54347	-0.464486	0.12384	0.751291
EPHA5,TEK	-3.93339	-0.769444	0.271565	0.750313
EPHA5,EPHA6	-6.37441	-0.369552	1.56177	0.748849
IGF1R,MST1R	-6.58413	-0.450849	1.17386	0.747875
AXL,SRC	-9.10645	-0.339813	4.84771	0.747632
ABL2,INSRR	-5.66127	-1.40435	0.341512	0.747632
HCK,INSR	-5.49635	-0.59549	0.805763	0.746904
EGFR,EPHB6	-3.41463	-0.703272	0.0970729	0.745936
JAK1,DDR1	-3.72968	-0.847345	0.245346	0.745936
FLT4,EPHA6	-7.12777	-0.609994	1.95821	0.745452
PDGFRB,EPHA1	-4.53491	-0.447665	0.233364	0.744004
FLT4,NTRK3	-4.21343	-0.701432	0.121306	0.743523
CSK,FGFR4	-3.31898	-0.753908	0.138824	0.743042
JAK3,NegCon	-3.25811	-0.509978	0.000304113	0.742802
FRK,EPHB2	-4.02633	-1.48921	0.101056	0.741602
EGFR,JAK1	-4.37606	-0.66014	0.204259	0.741363
EGFR,WEE1	-9.80429	-0.434701	3.98716	0.740645
KDR,SRC	-7.57798	-0.689831	3.05085	0.740645
IGF1R,CSF1R	-3.72976	0.381438	0.130475	0.740167
ABL1,EPHA2	-2.54509	-1.29266	0.0195875	0.739929
CSK,TYK2	-3.8652	-0.649159	0.0345631	0.737075
BTK,TEK	-3.5503	-1.26798	0.235301	0.735182
FLT4,EPHA2	-2.65946	-0.820476	4.34316e-05	0.734946
ROS1,EPHA1	-5.39122	-0.331427	0.237396	0.73471
FRK,EPHA10	-3.89833	-0.956179	0.0225965	0.734475
FLT3,WEE1	-12.0739	-0.654924	3.89042	0.733298
SYK,INSR	-4.48632	-0.860635	0.221559	0.732828
JAK2,BLK	-3.38141	-0.370937	0.00572685	0.731656
SRC,EPHA1	-7.05822	-0.556406	1.76955	0.730954
ABL1,RET	-4.43109	-0.528987	0.461552	0.730254
TXK,ROS1	-6.86748	-0.454533	1.03555	0.725842
KDR,ERBB4	-5.26099	-0.588625	0.304081	0.725611
BTK,EPHA6	-5.95668	-0.699181	0.831208	0.725611
WEE1,NegCon	-8.36128	-0.437167	2.98801	0.724689
INSR,WEE1	-11.558	-1.38016	3.41128	0.724458
PDGFRA,TEK	-5.20474	-0.859026	0.959398	0.723308
FLT1,FRK	-4.76555	-0.959714	0.243897	0.722849
JAK3,DDR2	-5.66903	-0.364574	0.668978	0.722162
PDGFRA,TYK2	-5.9703	-0.588043	0.512862	0.721704
FGFR3,EPHB3	-5.10236	-0.131832	0.165261	0.720333
TYK2,PTK2B	-3.88021	-0.085643	0.0124231	0.720105
SRC,MST1R	-9.15976	-0.350286	6.69897	0.719649
YES1,NTRK2	-6.40499	-0.957201	0.880414	0.716699
SYK,HCK	-5.21448	-0.761827	0.689519	0.716473
FGFR2,NegCon	-2.68702	-0.51373	0.000347575	0.713544
EPHA7,ABL2	-5.91042	-0.477715	0.767512	0.713095
TNK1,MST1R	-5.59667	-0.64243	1.08693	0.712198
IGF1R,EPHA3	-5.1611	-0.671505	0.38405	0.710857
ABL1,SYK	-4.06994	-0.414235	0.121938	0.709965
INSR,EPHA8	-3.70855	-0.911291	0.0829148	0.709965
TNK2,NegCon	-2.95267	-0.490274	0.004014	0.709075
ABL1,MST1R	-6.05096	-0.654014	0.661145	0.708631
YES1,EPHA3	-6.39977	-0.251127	1.26954	0.707966
EGFR,EPHA3	-3.83852	-0.714018	0.154778	0.707966
ABL1,DDR2	-4.86166	-0.712629	0.27597	0.704653
TYK2,EPHA5	-4.78033	-0.60674	0.302422	0.701584
ALK,KIT	-5.30552	-0.679228	0.57889	0.701365
FLT4,TNK2	-5.42588	-0.639909	0.840433	0.700493
RET,EPHA3	-4.57816	-0.610275	0.63097	0.700057
TYRO3,EPHB2	-3.93662	-0.440113	0.0395292	0.698536
ITK,NTRK1	-4.67078	-0.594266	0.124476	0.698102
FGFR3,PDGFRA	-5.0263	-0.635882	1.23136	0.697669
EGFR,EPHA2	-1.76733	-1.16557	0	0.697669
FLT4,EPHB6	-4.48142	-0.762	0.256098	0.696156
FYN,PTK6	-5.98299	-0.254976	0.931814	0.694864
EPHA4,EPHB1	-3.65459	-0.38291	0.0148431	0.694864
RET,TNK1	-3.85779	-0.434835	0.29226	0.694864
IGF1R,RET	-4.34465	0.608807	0.29465	0.694649
EPHA5,PTK2B	-3.38901	-1.09571	0.0669178	0.694649
IGF1R,WEE1	-11.066	-0.262096	4.05799	0.694219
FRK,HCK	-5.2033	-0.867783	0.386158	0.694004
TEK,NTRK2	-3.9715	-0.83542	0.0464819	0.693575
ABL1,EPHA6	-6.88012	-0.646958	1.00288	0.692718
FGFR2,EPHA2	-3.15082	-1.48127	0.0090399	0.692504
PDGFRA,TNK1	-4.94458	-0.736136	0.255707	0.692076
FGFR2,HCK	-6.25838	-1.25604	1.02209	0.691863
HCK,NTRK1	-5.41305	-0.52977	0.797784	0.691436
DDR2,EPHA5	-4.51825	-0.660894	0.278025	0.691222
KDR,LCK	-6.00164	-0.60761	0.334419	0.691009
ALK,NegCon	-1.73003	-0.399617	4.34316e-05	0.689944
KDR,FES	-6.25591	-0.828926	0.821023	0.68867
DDR1,EPHA1	-2.59904	-0.879096	0.000260655	0.68867
EPHA3,PTK2B	-3.43827	-0.264778	0.174379	0.688034
TYK2,MST1R	-6.45044	-0.186889	1.25547	0.687823
FYN,EPHB3	-6.9607	-0.562055	2.09854	0.686766
KIT,EPHA8	-4.74952	-0.548043	0.411392	0.685922
PDGFRA,PTK2B	-4.51247	-0.714504	0.213036	0.685501
FGFR3,ROS1	-5.43392	-0.134933	0.504317	0.683401
FLT3,EPHB1	-4.97153	-0.093525	0.269218	0.683191
EPHA1,ABL2	-5.44038	-0.455358	0.440452	0.682982
HCK,NegCon	-3.18398	-0.500175	0.00113064	0.682354
FGFR1,TEK	-3.48854	-0.86144	0.0327797	0.682146
JAK1,BMX	-3.29703	-0.66068	0.0640395	0.681311
IGF1R,PTK2	-13.4465	-0.92235	7	0.681102
FGFR2,FLT3	-6.51931	-1.42737	1.01941	0.679646
FYN,EPHA1	-5.13301	-0.52844	0.290815	0.679023
FGFR4,EPHA6	-6.79282	-0.444466	1.45905	0.678402
MET,SYK	-3.06237	-0.309991	0.00872961	0.678195
TYRO3,TYK2	-5.01095	-0.376449	0.299902	0.677781
HCK,EPHB6	-5.17227	-0.784697	0.569925	0.676129
FYN,INSR	-5.40623	0.055137	0.734475	0.675718
FGFR3,MERTK	-5.78717	-0.442047	0.632271	0.675512
KDR,PDGFRB	-5.05432	-0.721415	0.266803	0.675306
CSK,CSK	-2.14124	-1.49054	0.00300702	0.675101
TYRO3,EPHA8	-3.6736	-0.963206	0.0363066	0.673869
MET,MET	-2.77006	-1.56688	0.000521466	0.673869
PDGFRA,SRMS	-4.08634	-0.594978	0.116907	0.672845
YES1,EPHA1	-6.1537	-0.893956	0.977572	0.672641
KDR,PTK2	-12.5499	-0.770071	5.85387	0.672233
ITK,DDR2	-4.95035	-0.664899	0.368556	0.672028
TYK2,INSRR	-4.21276	-0.445315	0.0819172	0.67162
SRC,PTK2B	-6.18149	0.112096	1.57922	0.669992
BLK,EPHA3	-3.83282	-0.40185	0.0440718	0.669789
YES1,FLT4	-6.81837	-0.650498	1.0364	0.669586
JAK3,TYK2	-6.05038	-0.509322	0.731422	0.667966
TYRO3,SRC	-7.57911	-0.444743	1.84073	0.667158
SYK,ERBB4	-5.0728	-0.505963	0.302683	0.665949
JAK3,LYN	-7.59325	-0.176194	2.3213	0.665546
KIT,INSR	-5.69266	-0.311358	0.530915	0.665144
FGFR3,YES1	-5.97423	-0.265911	0.537602	0.664743
FLT4,FYN	-5.84996	-0.482873	0.495122	0.66354
ITK,EPHA10	-4.07669	-0.362516	0.0371573	0.66274
TXK,NegCon	-3.10935	-0.519965	0.0169604	0.662541
AXL,NegCon	-3.81876	-0.547324	0.177701	0.662541
FGFR2,MST1R	-6.3876	-0.358993	1.20004	0.658565
JAK2,MST1R	-5.79627	-0.765717	0.88706	0.65817
MERTK,FYN	-7.52493	-0.584537	1.84619	0.657577
TXK,EPHA4	-4.90363	-0.472739	0.111315	0.656788
YES1,EPHA8	-5.48511	-0.553613	0.296193	0.656198
FYN,EPHA4	-5.26208	-0.496141	0.615467	0.655608
JAK2,JAK1	-4.73038	-0.636139	0.333763	0.655608
CSK,MERTK	-5.10155	-0.780874	0.45556	0.655608
SYK,EPHB4	-3.62061	-0.999618	0.273517	0.655411
FGFR2,INSRR	-4.17038	-0.782785	0.110138	0.655019
EPHA5,EPHB1	-3.74831	-0.511965	0.0198602	0.654626
KIT,BLK	-5.19619	-0.68773	0.5318	0.654626
FLT3,FLT1	-5.54523	0.164757	0.674074	0.654234
SYK,NTRK2	-3.88815	-0.674666	0.0175026	0.654234
SYK,EPHA6	-6.63783	-0.70222	0.980053	0.653843
BTK,ERBB2	-3.26792	-0.849163	0.0175931	0.650917
HCK,EPHA1	-5.10545	-0.928719	0.353106	0.650722
SYK,WEE1	-10.0108	-0.121395	4.78781	0.649946
LYN,SYK	-6.40296	-0.391309	0.79129	0.649946
BTK,ERBB4	-4.55025	-0.70453	0.157204	0.649558
FGFR4,TEK	-4.51061	-1.10223	0.235376	0.649364
CSF1R,EPHA10	-3.31691	-0.630918	0.00590291	0.64859
IGF1R,TNK1	-3.8442	0.660122	0.181774	0.648397
EGFR,FES	-5.43272	-0.527533	0.582528	0.647432
EPHA1,LCK	-5.57564	-0.568484	0.274333	0.646084
FLT4,NegCon	-2.4547	-0.473444	0	0.645892
JAK3,HCK	-6.59334	-0.857989	1.01171	0.645699
EPHA5,TNK1	-3.57167	-0.486961	0.000738929	0.645507
ROS1,NegCon	-3.84843	-0.579609	0.0234208	0.645315
FGFR3,MET	-3.20142	-0.820295	0.00890689	0.645124
TYRO3,EPHA4	-4.22517	-0.76017	0.0992506	0.644932
KIT,PDGFRA	-6.36514	-0.154443	1.45247	0.643592
PDGFRB,PDGFRA	-5.84491	-0.374529	0.451488	0.642828
HCK,PTK2B	-4.46515	-0.538094	0.349013	0.641875
TYK2,DDR2	-5.21934	-0.263223	0.395882	0.641114
JAK3,EPHA5	-5.10642	-0.563237	0.449527	0.640924
JAK1,FES	-6.8257	-0.517116	1.30636	0.640354
YES1,PDGFRA	-7.49412	-0.61702	1.13083	0.639217
FRK,NTRK2	-3.81184	-0.72471	0.0142144	0.638272
EPHB4,TNK1	-3.21659	-0.554602	0.00300702	0.636388
FGFR2,NTRK1	-4.86811	-0.402008	0.373762	0.634138
KIT,ERBB4	-6.55546	-0.341347	1.50004	0.633764
HCK,TYK2	-6.3017	-1.12103	1.1197	0.632831
IGF1R,AXL	-5.75342	0.788068	0.470441	0.632458
ERBB3,NTRK2	-4.06248	1.09487	0.0325456	0.631899
TYRO3,INSR	-4.44127	-0.235482	0.0828622	0.631899
JAK1,PDGFRA	-6.01677	-0.719575	0.739452	0.631341
INSR,TEK	-4.43309	-0.74414	0.253055	0.630042
MET,NTRK2	-3.11756	-0.56547	0.00056495	0.629117
EPHA2,EPHA10	-1.95788	-0.612865	0	0.629117
BLK,EPHA6	-6.0293	-0.235406	1.13602	0.628747
IGF1R,YES1	-6.72464	0.0261419	0.9813	0.628009
ABL2,SRMS	-4.81106	-0.546868	0.403843	0.627825
ERBB2,TEK	-3.4366	0.324929	0.091247	0.627456
FYN,EPHB1	-5.16895	-0.267851	0.457424	0.625802
RET,MERTK	-6.08135	-0.378231	1.61368	0.625068
AXL,TEK	-5.38955	0.0481722	0.648204	0.624336
CSF1R,EPHA2	-1.71549	-1.1223	0	0.624336
DDR1,EPHA5	-2.81434	-1.01324	0.0010871	0.623606
FGFR3,SYK	-3.57847	-0.0745662	0.0605806	0.619608
JAK1,TNK1	-4.54365	-0.483902	0.240181	0.619427
BMX,EPHB1	-2.22848	-0.373146	0.00169706	0.619066
BTK,SYK	-3.24783	-0.646402	0.000695428	0.618704
FGFR4,EPHA3	-4.5595	-0.542876	0.53121	0.618524
JAK1,AXL	-6.56546	-0.47136	0.909037	0.617623
ABL1,EPHB4	-3.615	-0.428633	0.0854453	0.615288
AXL,EPHA8	-4.96544	-0.455577	0.542269	0.615288
SRC,WEE1	-14.2641	-0.747898	7	0.61493
FGFR4,FES	-6.2092	-0.499085	0.962574	0.614751
MERTK,TYK2	-6.67076	-0.279022	1.44334	0.613501
SYK,AXL	-5.88441	-0.772937	0.625985	0.612966
JAK2,TXK	-4.8513	-0.400726	0.154778	0.611189
FRK,EPHA1	-3.77225	-0.995555	0.128777	0.610302
MERTK,ERBB4	-7.07442	-0.376874	1.85636	0.608007
CSK,CSF1R	-2.54089	-0.929532	0.00970555	0.606952
IGF1R,TXK	-5.46065	0.166498	0.493224	0.606425
LCK,NegCon	-3.91547	-0.586562	0.116793	0.605899
BMX,BMX	-1.15773	-1.98868	0.00436481	0.605023
EPHA5,SRMS	-3.024	-0.967426	0.000347575	0.604848
FLT3,HCK	-6.54573	-0.608122	1.10891	0.604324
TNK1,TEK	-3.66507	-0.478102	0.108184	0.603626
KDR,MST1R	-5.89007	-0.521939	1.05894	0.603452
JAK2,ERBB3	-3.87612	1.31716	0.0351278	0.602929
CSK,INSR	-3.26295	-0.461558	0.0126466	0.602929
PDGFRB,CSK	-3.96412	-0.8364	0.0404816	0.602929
BLK,EPHA8	-2.87616	-0.663425	0.00966114	0.60206
FES,EPHA1	-5.6763	-0.47773	1.19873	0.600846
BTK,BTK	-2.71896	-1.2081	0.0183173	0.600499
EPHB4,PTK6	-3.98761	-0.157368	0.0693566	0.599462
IGF1R,EPHA2	-2.31232	0.866503	0.000912977	0.599117
MET,SRC	-6.28798	-0.148228	0.858864	0.599117
AXL,DDR1	-4.52874	-0.467929	0.217958	0.598944
EPHA2,EPHA8	-1.51896	-1.12837	4.34316e-05	0.598772
FYN,NTRK2	-5.30211	-0.492015	0.507799	0.598599
MET,TNK2	-4.09459	-0.441458	0.0927499	0.598427
BTK,FRK	-3.08571	-0.526533	0.006035	0.598427
AXL,INSR	-6.22608	-0.731383	1.33639	0.598083
JAK2,PDGFRB	-4.59407	-0.346631	0.145998	0.597567
FYN,BLK	-5.0304	-0.51611	0.252666	0.595337
PDGFRB,EPHB4	-4.27714	-0.416563	0.020816	0.594995
TYRO3,ABL2	-5.99674	-0.444916	0.680686	0.594995
EPHA8,MST1R	-4.97347	-0.452892	0.547447	0.594654
YES1,NTRK1	-6.30425	-0.145737	0.668978	0.594483
TXK,WEE1	-11.4232	-0.313723	3.40938	0.594142
PDGFRB,CSF1R	-4.22607	-0.39145	0.0939345	0.59346
BLK,PTK6	-4.22325	-0.297523	0.0908721	0.592949
ROS1,MST1R	-7.58096	-0.346615	1.545	0.59193
WEE1,TNK2	-10.9999	-0.0720333	4.70553	0.591421
SYK,BLK	-3.4676	-0.342214	0.00921731	0.591251
ITK,EPHB2	-4.16119	-0.797506	0.0741724	0.591251
MST1R,NegCon	-3.85858	-0.597493	0.00178427	0.590743
FLT3,EPHA4	-5.23672	-0.643018	0.597911	0.589898
CSF1R,MST1R	-5.23272	-0.520207	0.841035	0.588549
FLT4,TYK2	-5.26416	-0.504454	0.812761	0.587539
KDR,JAK3	-5.22382	-0.381865	0.588212	0.586197
KDR,FGR	-4.35039	-0.593728	0.223517	0.586197
EPHB4,EPHB2	-3.11402	-0.32593	0.0433994	0.585528
TXK,CSF1R	-4.36269	-0.227983	0.189297	0.58486
WEE1,DDR2	-11.1918	-0.725494	4.46471	0.58486
EPHA3,EPHA3	-4.33564	-0.0517398	0.254925	0.582528
ABL2,ERBB3	-5.78346	1.1876	0.759451	0.581533
KDR,EPHB2	-3.81949	-0.547379	0.0483226	0.581533
AXL,PTK2	-13.8592	-0.314103	7	0.581202
FGFR2,FGFR2	-5.62935	-1.11156	0.392759	0.580871
PDGFRA,TXK	-6.10242	-0.423301	1.60415	0.580375
EPHA4,EPHA6	-6.41537	-0.487004	1.89517	0.580209
FGFR2,LYN	-7.01871	-0.200763	1.19716	0.578396
BTK,FGFR4	-3.68444	-1.00999	0.114695	0.578067
ERBB2,NegCon	-1.89078	-0.443734	0	0.577246
PDGFRA,ERBB4	-6.25355	-0.537598	0.676335	0.576426
LYN,EPHA8	-5.5159	-0.139523	0.399899	0.575282
WEE1,EPHB1	-9.7043	0.137628	4.73049	0.573326
FGFR3,INSRR	-2.89572	0.266908	0.00410168	0.571865
KDR,FLT3	-5.48071	-0.643067	0.469672	0.571379
JAK2,TYRO3	-4.21377	-0.769003	0.0209071	0.571056
PDGFRA,EPHA4	-5.13124	-0.850205	0.86774	0.570732
EPHA2,MST1R	-3.94145	-0.629851	0.0102833	0.569925
RET,LYN	-6.78358	-0.561296	1.09383	0.568958
BTK,EPHB3	-4.64134	-0.365595	0.247107	0.568636
IGF1R,EPHB4	-3.37306	1.04684	0.0519295	0.568154
PTK2B,MST1R	-5.07792	-0.540293	0.601713	0.567672
WEE1,EPHA10	-10.7219	-0.997752	2.77885	0.567351
YES1,FYN	-7.5614	-0.19708	1.96377	0.56687
BTK,MST1R	-4.76664	-0.0135147	0.267848	0.56671
SYK,EPHB2	-3.56701	-0.306944	0.0225965	0.56671
SYK,EPHA2	-2.10235	-0.756024	0.000130308	0.565751
MET,INSRR	-2.63959	-0.611629	0.000695428	0.565271
EGFR,NTRK2	-3.38977	-0.644627	0.00178427	0.564633
LCK,TEK	-5.98857	-0.783344	0.444301	0.563996
SYK,MERTK	-5.67789	-0.135036	1.17816	0.563519
JAK3,NTRK3	-4.78774	-0.294833	0.301638	0.563519
BMX,EPHA5	-2.377	-0.86033	4.34316e-05	0.563043
CSF1R,NTRK3	-3.12891	-0.543838	0.0117087	0.562567
IGF1R,LYN	-6.90791	0.13188	1.15789	0.561299
SYK,TXK	-5.11108	-0.68563	0.236048	0.560825
EGFR,FGFR3	-3.40929	-0.739358	0.0621813	0.560825
TXK,ERBB4	-5.85706	0.0896946	0.823619	0.560194
ABL1,BLK	-3.76597	-0.443993	0.0827046	0.560194
SYK,EPHB1	-3.89872	-0.706282	0.0213174	0.560194
CSF1R,ERBB2	-3.19427	-0.255981	0.02365	0.559721
RET,EPHA2	-2.34732	-0.667413	0.00208963	0.559563
FGFR1,ERBB4	-4.31505	-0.129195	0.163549	0.559248
BLK,EPHB6	-3.56158	-0.675279	0.0423927	0.557677
BLK,TEK	-3.31811	0.0161821	0.0237876	0.55752
ABL1,TYK2	-4.9211	-0.34898	0.124129	0.55752
JAK2,ITK	-3.99348	-0.200856	0.0314704	0.554085
PDGFRA,EPHB4	-4.49097	-0.365115	0.294735	0.552842
FGFR4,SRMS	-3.09581	-0.259589	0.0378201	0.552687
SRC,INSR	-7.44047	-0.170886	2.55909	0.55083
MET,YES1	-5.45782	-0.49438	0.266402	0.550676
CSF1R,PTK2	-11.3156	-0.272342	7	0.549289
FGR,ABL2	-5.86115	-0.345267	0.90101	0.548828
ITK,TNK1	-4.05761	-0.575398	0.034281	0.548674
RET,AXL	-5.90492	-0.446423	0.865186	0.548367
ABL2,NTRK2	-5.57008	-0.354657	0.865186	0.54806
EPHA8,NTRK2	-3.05538	-0.440413	0.00252624	0.5476
SYK,INSRR	-3.48876	-0.864366	0.0121104	0.54546
PDGFRB,DDR2	-5.39864	-0.556253	0.938548	0.545155
DDR1,PTK2B	-1.92629	-0.21999	0.000304113	0.54485
JAK1,EPHA2	-3.00312	-0.724414	0.00912859	0.544394
TNK1,NegCon	-1.72295	-0.395118	0	0.544242
YES1,EPHB4	-5.64201	-0.356139	0.560036	0.54333
TXK,MST1R	-6.90274	-0.49936	1.20004	0.542724
KDR,JAK2	-3.97307	-0.697924	0.0473044	0.542269
EPHA1,NegCon	-1.70497	-0.390387	0	0.541816
JAK2,WEE1	-10.3079	-0.55463	3.55925	0.539854
INSR,EPHA1	-4.02524	-0.550997	0.142547	0.538201
CSF1R,NegCon	-1.42446	-0.325002	0	0.538052
FYN,WEE1	-12.5655	-0.999282	4.57025	0.537003
EPHA6,TNK2	-7.27508	-0.114216	1.88207	0.536555
BMX,TEK	-2.58464	-1.16777	0.006035	0.536406
HCK,DDR2	-5.56096	-0.304078	0.475474	0.536256
MET,FLT1	-3.73572	-0.33827	0.00749066	0.535064
HCK,ABL2	-6.96517	-0.524437	1.25228	0.53432
LYN,EPHA4	-6.07199	-0.0263732	1.00061	0.534171
PDGFRB,FRK	-4.65111	-0.424424	0.253132	0.534023
TYK2,ERBB3	-4.81316	1.37268	0.266482	0.533874
FYN,EPHA3	-5.40055	0.0289926	0.439018	0.533726
EGFR,BMX	-2.06895	-1.24988	0.000304113	0.533726
FLT4,EPHA4	-4.20494	-0.343399	0.0222307	0.533281
FGFR1,MST1R	-5.22405	-0.615931	0.825359	0.531948
EPHB4,EPHA5	-3.3863	-0.640887	0.0133626	0.5318
ROS1,INSRR	-5.0646	-0.309293	0.141643	0.531505
TYRO3,ROS1	-6.1158	-0.610803	0.873869	0.531505
HCK,EPHB1	-5.14593	-0.739035	0.399899	0.531357
ABL1,YES1	-6.22712	-0.137939	1.15027	0.53121
YES1,NegCon	-4.32563	-0.513908	0.068593	0.529884
EPHA5,EPHA5	-3.94857	-0.95349	0.0365427	0.52959
YES1,BLK	-5.68946	-0.197546	0.41005	0.529296
AXL,FYN	-7.2212	-0.464491	1.70863	0.529002
KDR,YES1	-6.48673	-0.728638	0.786217	0.528122
TYRO3,MST1R	-6.16743	-0.679278	1.85886	0.527536
DDR1,ABL2	-4.3908	-0.219702	0.187889	0.52739
PDGFRA,WEE1	-12.9649	-1.72481	5.82391	0.527097
CSK,PTK6	-3.47386	-0.0925183	0.0173218	0.526951
PDGFRA,HCK	-6.17475	-0.410575	0.728856	0.526367
SRC,TEK	-7.3733	-0.558608	3.42102	0.525056
EPHA1,TNK2	-4.55371	-0.357035	0.192736	0.524474
EPHA6,MST1R	-8.22021	-0.136064	5.24413	0.524329
PDGFRB,TXK	-5.6786	-0.115743	0.610125	0.524038
KDR,EPHA6	-6.4598	-0.173273	0.677988	0.524038
MERTK,DDR2	-6.28292	-0.164288	0.767258	0.523024
FLT4,NTRK1	-4.59667	-0.311601	0.32039	0.522734
KDR,FLT4	-4.60698	-0.629678	0.318397	0.522011
PDGFRB,NegCon	-2.86995	-0.498686	0	0.521722
RET,INSR	-4.07381	0.268448	0.109467	0.521578
FGFR4,SYK	-4.12171	-0.423907	0.0581409	0.520713
HCK,TNK2	-6.06397	-0.490863	1.09648	0.520713
EPHB4,EPHA4	-3.28869	-0.482922	0.0141246	0.520137
DDR1,ITK	-3.00916	-0.346378	0.002046	0.519993
EPHB6,ERBB4	-5.0177	-0.506021	0.371918	0.518701
YES1,PTK2B	-5.19962	0.0522236	0.805208	0.518414
DDR2,MST1R	-6.16339	-0.221865	1.65857	0.517984
EGFR,SRC	-6.7062	-0.410805	1.78068	0.517555
KDR,TNK1	-3.74521	-0.408015	0.0364955	0.516984
BMX,INSRR	-1.86309	-0.739044	0.000217202	0.516984
MERTK,MST1R	-7.74261	-0.309216	1.61618	0.515131
EPHA1,EPHA4	-3.44234	-0.300642	0.00467199	0.514989
FGFR3,FGFR4	-3.58063	0.491271	0.227019	0.514847
FLT4,INSRR	-3.8126	-0.507922	0.00577086	0.514847
FGFR2,EPHA4	-4.31789	-0.152628	0.195997	0.514705
INSRR,MST1R	-5.19477	-0.512904	0.381324	0.514563
TYK2,EPHA1	-4.49196	-0.393852	0.221487	0.513286
INSR,NegCon	-2.33063	-0.478476	4.34316e-05	0.512862
EGFR,PTK2B	-2.68363	-0.442482	0.000434512	0.510886
FRK,NegCon	-1.84541	-0.437365	0	0.510463
BTK,FLT4	-3.47425	-0.0857785	0.0115748	0.509901
PTK2B,NTRK2	-3.02848	-0.240784	0.0392439	0.509761
ABL1,EPHB3	-5.52187	-0.287397	0.472757	0.509059
EPHA1,EPHA7	-3.85851	-0.511936	0.012736	0.508498
PDGFRA,NegCon	-3.11844	-0.513913	0.0408155	0.508498
MET,AXL	-4.91279	-0.369329	0.673869	0.508078
FGFR1,HCK	-4.41178	-0.290876	0.0762898	0.507938
JAK1,EPHA8	-4.08394	-0.664661	0.217599	0.5071
PTK2B,NegCon	-1.26157	-0.273226	0	0.506263
RET,CSF1R	-3.64297	-0.535826	0.627456	0.505985
FLT4,BLK	-3.94434	-0.335623	0.0142593	0.505428
JAK1,EPHA1	-4.40084	-0.284862	0.724228	0.504872
JAK1,WEE1	-11.2412	-0.407787	3.95311	0.504733
FYN,SRMS	-4.12585	0.0173922	0.0636874	0.504594
FGFR4,EPHA1	-3.74652	-0.171777	0.0490027	0.504456
YES1,DDR1	-5.03574	-0.548582	0.247567	0.504178
BTK,CSF1R	-2.75728	-0.758574	0.000869459	0.50404
EPHB3,INSRR	-4.44102	0.223496	0.0614302	0.503347
FGFR2,EPHB3	-5.82961	-0.0204074	1.03815	0.503347
TXK,ITK	-5.40958	-0.539555	0.420331	0.503209
DDR2,NegCon	-2.55121	-0.476801	4.34316e-05	0.502794
RET,FLT1	-4.80104	-0.465289	0.311491	0.502379
INSR,TNK1	-3.9733	-0.419083	0.0234208	0.501827
IGF1R,DDR2	-4.71061	0.540396	0.301812	0.501001
HCK,NTRK3	-4.73414	-0.326119	0.134481	0.50045
SRC,EPHA7	-7.25054	-0.126281	3.41128	0.500313
PDGFRA,CSF1R	-4.4463	-0.362348	0.18809	0.500313
MERTK,INSR	-6.16587	-0.324452	0.841638	0.499626
PTK6,PTK2B	-3.60972	0.222208	0.040148	0.499215
ABL1,FES	-6.08561	-0.369467	0.450139	0.499078
FGFR1,LYN	-5.78905	-0.333977	0.403293	0.498804
FRK,LCK	-5.51306	-0.187845	0.370387	0.498667
BTK,EPHA1	-2.96326	-0.568898	0.00935041	0.49853
CSK,NegCon	-0.957581	-0.202653	0	0.498393
SYK,EPHA1	-3.72114	-0.663692	0.00912859	0.498393
MET,PDGFRB	-3.99553	-0.425733	0.00379489	0.497436
FLT3,LYN	-7.39885	0.167019	2.92336	0.4973
JAK3,EPHA1	-4.77437	-0.241424	0.21467	0.4973
TYK2,EPHA7	-4.93072	-0.373435	0.262569	0.496482
EPHB4,EPHA6	-5.97308	-0.395302	0.891097	0.496345
JAK3,MET	-4.23063	-0.121785	0.133713	0.495529
EPHB3,TEK	-5.16732	-0.0791528	0.438064	0.49485
CSK,EPHA3	-3.13744	-0.23062	0.0688983	0.494579
ABL2,PTK2	-13.7316	-0.185726	6.69897	0.494443
EPHB2,NegCon	-1.72884	-0.398104	8.68676e-05	0.494443
CSK,SYK	-2.84643	-0.363215	0.00278842	0.494307
ABL1,INSR	-4.42499	-0.336866	0.118216	0.494036
FGFR3,SRMS	-2.56382	0.155922	0.000738929	0.49363
BTK,HCK	-4.17044	-0.088345	0.0672726	0.493495
AXL,TYK2	-6.50262	-0.325122	0.862646	0.493089
BTK,IGF1R	-3.21188	1.2413	0.0634863	0.492279
PDGFRB,ERBB3	-4.77211	1.45905	0.406603	0.49174
LYN,BMX	-4.61411	0.0448652	0.189633	0.49147
MET,MST1R	-4.73889	-0.0190654	0.445511	0.490932
BLK,TYK2	-4.16785	0.0070942	0.152304	0.489455
KDR,NTRK2	-4.06376	-0.795978	0.0383891	0.48825
BTK,YES1	-5.43277	-0.388467	0.682354	0.487983
JAK3,NTRK1	-5.2666	-0.154477	0.456553	0.486649
ERBB4,PTK2B	-4.35438	-0.354254	0.186552	0.486383
CSF1R,EPHA5	-3.31488	-0.559242	0.0136762	0.485054
SYK,NegCon	-1.94587	-0.453958	0	0.484126
TYRO3,NTRK3	-3.91202	-0.489559	0.032031	0.482936
ABL1,SRC	-7.2544	-0.114192	2.12045	0.482804
FGFR4,PDGFRA	-5.27992	-0.457573	0.786217	0.482672
FGFR4,DDR1	-2.96588	-0.46316	0.00410168	0.481749
TYRO3,EPHB1	-4.13953	-0.513416	0.0781575	0.481223
INSR,BMX	-2.7014	-0.489446	0.0133626	0.481091
MET,BLK	-2.82095	-0.513648	0.000912977	0.48096
IGF1R,FLT1	-5.28588	-0.300957	0.724458	0.480172
EPHA7,NegCon	-2.18767	-0.499195	0	0.480172
FES,EPHA10	-5.71201	-0.331842	0.936291	0.47991
KDR,KIT	-5.18204	0.162206	0.875496	0.479124
PTK6,SRMS	-3.59445	-0.325806	0.0062993	0.479124
FLT1,PDGFRA	-5.63835	-0.390658	0.296021	0.478208
EPHA1,EPHA5	-3.52429	-0.424096	0.00248256	0.477165
ERBB4,NegCon	-3.18448	-0.500523	0.0047598	0.477034
KIT,RET	-5.46481	-0.123445	1.14752	0.476904
PDGFRB,FLT4	-5.07923	-0.175552	0.534468	0.476904
ALK,EGFR	-3.10234	-0.340068	0.0214087	0.475215
ABL1,DDR1	-2.99922	-0.625169	0.227752	0.475215
BTK,FLT1	-3.76179	-0.332062	0.00187149	0.474307
ITK,EPHA6	-6.96445	-0.558143	1.11238	0.473015
BMX,DDR1	-1.28555	-0.895337	0	0.472886
KIT,NegCon	-3.54057	-0.540734	0.055468	0.472757
EPHA8,LCK	-4.79138	-0.0249655	0.123032	0.472112
KDR,CSK	-3.1283	-0.692878	0.0578927	0.471855
HCK,MST1R	-6.78465	-0.217377	1.27213	0.470826
KIT,FES	-7.38541	-0.286838	1.73518	0.470313
RET,EPHB2	-3.8041	-0.309972	0.88306	0.469672
FLT4,DDR2	-4.83749	-0.269673	0.321027	0.469288
EPHB4,NegCon	-1.46213	-0.338545	0	0.467373
EPHB6,MST1R	-5.63911	-0.420762	0.704873	0.46572
EPHA5,TNK2	-4.77632	-0.436576	0.687823	0.465086
JAK2,EPHA4	-3.76583	-0.679264	0.0102388	0.464706
JAK3,EPHA3	-5.07617	0.229585	0.451733	0.464326
FGFR4,INSR	-4.52282	-0.435078	0.125924	0.464073
ALK,NTRK1	-3.70068	0.0499553	0.03711	0.46382
PDGFRA,AXL	-6.60497	-0.0994209	1.76574	0.46382
BMX,SRMS	-1.37644	-0.41523	0	0.463063
JAK3,JAK1	-5.91591	-0.333509	0.909037	0.462685
MERTK,TNK2	-6.31392	0.389133	0.78094	0.462559
BLK,NTRK3	-3.26564	-0.439275	0.00780007	0.462307
ITK,ERBB3	-4.38633	1.33336	0.385736	0.461803
PDGFRA,NTRK2	-4.95017	-0.456391	0.296967	0.461803
FLT1,NegCon	-2.64249	-0.498818	0	0.461426
ITK,NegCon	-2.34131	-0.481565	0	0.461049
EGFR,IGF1R	-4.02741	-0.0936845	0.170439	0.460798
FGFR4,BLK	-3.79719	-0.464792	0.0543345	0.459796
MET,EPHB2	-2.8273	-0.246516	0.0357875	0.45917
EGFR,TNK2	-4.38365	-0.468326	0.176852	0.458795
FGFR1,EPHB4	-2.82915	-0.517313	0.00156628	0.458546
EPHA1,EPHB3	-5.18533	-0.561889	0.292685	0.458546
HCK,EPHA10	-4.88932	-0.330559	0.185153	0.458171
EGFR,SYK	-3.16571	-0.0376286	0.0169152	0.457797
FLT3,SYK	-5.1515	-0.308604	0.70708	0.457548
TXK,EPHB4	-4.57865	-0.527799	0.298001	0.456429
FGFR3,NegCon	-1.86555	-0.44526	0	0.455808
FLT4,HCK	-5.5376	-0.478394	0.49853	0.455436
TYK2,NegCon	-2.86276	-0.497068	0	0.455312
FLT3,INSRR	-4.29299	0.237513	0.311936	0.454817
JAK2,TYK2	-4.56427	-0.306746	0.186819	0.454569
RET,ERBB3	-4.16414	1.44428	0.26528	0.453457
FGFR1,PTK6	-3.77371	0.0804948	0.0294207	0.453087
INSR,MST1R	-5.9704	-0.26338	0.748362	0.453087
HCK,LCK	-6.97617	-0.400307	1.11862	0.452964
FLT1,HCK	-5.66597	-0.335935	0.514847	0.452718
PTK6,LCK	-6.54754	-0.464066	1.12326	0.451365
BLK,FES	-5.50562	-0.382208	0.753994	0.451242
MET,TYRO3	-3.36027	-0.276368	0.00265731	0.450384
FES,PTK2	-13.3068	0.414586	7	0.450016
EPHA4,PTK2B	-3.09973	-0.498242	0.00881824	0.448794
CSF1R,TNK2	-4.19878	-0.20394	0.11833	0.446602
LYN,EPHA5	-6.27912	-0.309489	1.19949	0.446481
JAK3,EPHA2	-3.20294	-0.250697	0.00383871	0.44636
KIT,HCK	-6.62775	-0.452121	0.961777	0.445632
KIT,MST1R	-6.9181	0.0962779	1.71153	0.445148
MET,FGFR4	-3.38416	-0.397921	0.0154727	0.445148
FLT3,EPHA3	-5.15592	0.278522	0.626904	0.444664
FYN,INSRR	-4.79579	-0.443317	0.318216	0.444664
LYN,ERBB4	-7.21117	0.170568	1.09577	0.44406
EPHA10,EPHB2	-3.48175	-0.361005	0.0570004	0.443818
ERBB4,TEK	-4.74159	0.12436	0.152366	0.443577
JAK1,JAK1	-5.32954	-0.0230119	0.559563	0.442733
FYN,NegCon	-3.4751	-0.536516	0.00217692	0.442132
FGFR4,SRC	-7.10477	0.142123	1.56864	0.441772
AXL,EPHB6	-5.45716	-0.185224	0.619066	0.441651
ABL1,NegCon	-2.20055	-0.493851	0.00322573	0.441651
FGFR2,FLT4	-5.06695	-0.480411	0.624154	0.441171
FRK,ROS1	-5.36274	-0.0504532	0.490797	0.438899
JAK1,PTK6	-5.39497	-0.309347	0.549905	0.438064
FLT3,BLK	-4.92127	-0.42718	0.365926	0.437588
IGF1R,NegCon	-2.82137	-0.51441	0.0500248	0.43735
EPHA8,PTK2B	-2.22739	0.146681	4.34316e-05	0.437113
KIT,FYN	-6.49942	0.171436	1.74666	0.436519
KIT,EPHA3	-5.55724	-0.124692	0.753009	0.4364
ABL1,HCK	-5.23266	-0.340875	0.841638	0.436282
KDR,RET	-4.29732	-0.500608	0.201833	0.435452
EPHA3,MST1R	-5.65906	0.213741	0.564156	0.435334
ABL1,LYN	-6.65888	-0.387541	1.40132	0.433209
DDR1,DDR1	-1.51671	-0.578398	0	0.432621
ROS1,DDR1	-4.51295	-0.381483	0.159768	0.432268
JAK2,NTRK2	-3.64326	-0.391074	0.0128255	0.432033
WEE1,TNK1	-9.86356	-0.208147	3.78068	0.431564
ABL1,NTRK2	-4.03667	-0.496359	0.139363	0.431095
FGFR4,NegCon	-2.2411	-0.484625	0.000651931	0.430041
TYRO3,EPHA10	-4.01302	-0.381909	0.0330608	0.429574
FLT4,EPHA1	-3.93763	-0.131938	0.00850811	0.42934
NTRK1,NTRK3	-3.70299	-0.0401273	0.0361178	0.429224
JAK2,CSF1R	-3.08725	-0.12929	0.0212718	0.429224
EPHA2,EPHA4	-1.9582	-0.579937	0	0.429224
DDR1,NTRK1	-2.87206	-0.174153	0.00370728	0.42899
TNK1,TNK2	-4.57821	-0.376888	0.474437	0.427826
ABL2,PTK2B	-4.92279	-0.312944	0.266402	0.427361
ABL2,ERBB2	-5.34464	0.0231431	0.487849	0.427245
YES1,JAK1	-7.00454	-0.342774	1.39577	0.426896
ABL1,ERBB3	-4.12409	1.5104	0.201902	0.426085
EPHA6,NTRK2	-6.22904	-0.127147	1.3903	0.424466
CSK,BLK	-2.60858	-0.568448	0.00581487	0.423659
FLT1,EPHA5	-4.37045	-0.267673	0.25814	0.423543
NTRK1,NegCon	-2.27574	-0.483664	0	0.423313
FLT1,SRC	-7.89986	-0.320891	3.03977	0.422738
FYN,EPHB6	-5.14771	-0.226788	0.212894	0.422393
TYRO3,NegCon	-2.2775	-0.482298	0	0.422393
FGFR3,FRK	-2.9948	0.926362	0.0112627	0.422278
EPHA3,EPHB3	-5.36591	0.139078	0.420788	0.421934
PTK2,NTRK2	-11.7661	-0.241251	7	0.421361
FGFR3,TYK2	-4.34891	0.100651	0.0817599	0.420331
MERTK,EPHA3	-6.00139	-0.0906997	1.61961	0.419874
WEE1,EPHB3	-11.516	-0.0181656	4.14388	0.418505
RET,EPHA1	-3.89989	-0.553415	0.236947	0.418392
ERBB3,TEK	-3.98939	1.46583	0.0735547	0.417482
FLT4,ABL2	-6.12921	-0.367723	1.96658	0.416801
AXL,ERBB4	-6.77616	-0.258853	0.876148	0.414765
JAK3,SRC	-8.40122	-0.182564	4.86967	0.414426
EPHA2,EPHA2	-0.333662	-0.790485	0	0.414426
FGFR2,NTRK3	-4.03497	0.0628749	0.0118872	0.414201
ABL1,IGF1R	-4.06043	1.04289	0.656788	0.413976
YES1,TXK	-6.92966	0.128215	1.24026	0.41375
FLT4,LCK	-6.15146	-0.270037	0.678402	0.413525
HCK,ERBB2	-4.86127	-0.221636	0.164373	0.413413
HCK,BMX	-3.54986	-0.519179	0.0297461	0.413075
EPHA1,EPHA6	-6.19441	-0.367983	1.09082	0.412626
FLT1,ABL2	-6.28997	-0.319459	1.38891	0.412177
INSR,INSRR	-3.48974	-0.0713323	0.0400528	0.411616
TYK2,WEE1	-10.6965	0.124682	4.73049	0.411168
LYN,FYN	-7.76945	-0.131696	2.67531	0.411168
JAK3,KIT	-6.37957	0.0344494	1.27811	0.410944
INSRR,NegCon	-1.38852	-0.315783	0	0.410609
BLK,DDR2	-4.08134	-0.393606	0.0265027	0.410274
ITK,EPHA8	-3.51258	-0.480056	0.0099721	0.41005
EPHA3,ERBB3	-4.2954	1.40129	0.160648	0.409716
JAK2,CSK	-2.84778	-0.65088	0.00559485	0.409604
PDGFRB,NTRK1	-4.91382	-0.19473	0.22439	0.409493
ROS1,EPHA5	-5.51362	-0.250135	0.454075	0.409493
DDR2,ERBB4	-5.6754	-0.48836	0.575935	0.40927
ROS1,ERBB4	-6.4137	0.328249	1.00013	0.40849
LYN,WEE1	-13.1741	-0.518376	7	0.408045
EPHA4,NegCon	-1.8476	-0.439268	0	0.407823
FGFR3,EPHA3	-3.9869	-0.199525	0.0715017	0.40749
KDR,FYN	-4.92223	0.492977	0.573814	0.407379
TNK2,ERBB2	-4.37116	0.253104	0.635074	0.406714
TXK,EPHA3	-5.2204	-0.25985	0.329105	0.406271
EPHA1,EPHB1	-3.36085	-0.0501051	0.00445255	0.405386
KDR,JAK1	-4.733	-0.222364	0.138585	0.405055
EPHA6,EPHA8	-5.76695	-0.472033	0.68361	0.403623
FGFR1,WEE1	-9.49121	-0.19227	3.1396	0.403183
BMX,NTRK2	-2.32008	-0.658824	0.000304113	0.402854
ABL2,NTRK3	-5.32299	-0.282824	0.498393	0.402524
JAK2,FES	-5.78058	-0.441912	1.10557	0.402305
JAK3,DDR1	-3.88229	-0.351032	0.0165993	0.402195
JAK1,EPHA6	-7.20992	-0.176711	1.57496	0.401538
FLT4,TYRO3	-4.58957	-0.29672	0.409716	0.400663
WEE1,NTRK3	-9.70538	-0.0779403	3.97551	0.400444
KDR,ABL2	-5.85775	-0.511073	0.750313	0.400444
FLT1,TYRO3	-4.72432	-0.2241	0.19552	0.399899
EPHA10,PTK6	-4.2153	0.0694065	0.0110845	0.398918
MERTK,EPHA5	-5.72507	-0.326892	0.432503	0.398592
CSK,ITK	-3.25714	-0.43178	0.0241089	0.398157
EPHA1,EPHA3	-3.93913	-0.435236	0.045661	0.398049
KDR,EPHA8	-3.33771	-0.635675	0.0573968	0.397831
YES1,ROS1	-7.74731	0.00756992	1.42666	0.397723
EPHB2,INSRR	-2.99884	-0.240965	0.0660068	0.397614
AXL,EPHA4	-5.44927	-0.263284	0.809949	0.397289
FGFR4,EPHA8	-3.36191	-0.360367	0.0296066	0.396639
AXL,CSF1R	-4.98699	-0.153644	0.467755	0.396098
FYN,CSF1R	-4.68605	-0.191854	0.137332	0.395234
CSK,NTRK2	-2.51428	0.301621	0.00130484	0.394803
MERTK,INSRR	-5.28458	-0.386251	0.826522	0.394803
DDR2,EPHB2	-4.17758	-0.330821	0.107071	0.394587
JAK2,FLT3	-4.95281	-0.14865	0.231288	0.394372
ALK,ABL2	-5.01884	0.319936	0.190036	0.394049
LYN,EPHB3	-7.51616	0.186665	2.30865	0.393726
EPHB6,LCK	-5.33131	0.171357	0.470955	0.393726
FLT4,NTRK2	-4.20813	-0.282996	0.0157428	0.393081
INSR,DDR1	-3.03922	-0.441675	0.00572685	0.392438
EPHA1,EPHA1	-3.32706	-0.354372	0.0108618	0.392331
KDR,TXK	-5.02288	-0.294485	0.189969	0.391474
SYK,FGR	-3.78467	0.164163	0.0297461	0.391153
EPHA10,NegCon	-1.83559	-0.432705	0	0.389979
RET,BMX	-2.35514	0.118024	0.0220479	0.389872
FGFR4,LCK	-5.63784	0.228487	0.516698	0.389766
PDGFRA,EPHB1	-4.65358	0.0333324	0.24382	0.389766
TYRO3,HCK	-5.11696	-0.0132743	0.257118	0.389659
LYN,PDGFRA	-7.19446	0.125549	1.54303	0.389553
AXL,EPHA7	-5.56086	0.120557	0.376647	0.389446
PDGFRA,LCK	-6.60997	0.0337276	1.5904	0.388171
PDGFRB,EPHB6	-4.39469	0.0695854	0.0154727	0.387958
FLT4,ERBB3	-4.17407	1.92568	0.0987597	0.387852
EPHA2,LCK	-3.78005	-0.162699	0.338187	0.38764
MET,NegCon	-1.20497	-0.26512	0	0.387216
EPHA3,EPHA4	-4.16318	-0.590409	0.200453	0.386898
PDGFRB,MST1R	-6.39834	-0.0973474	1.94846	0.386581
EPHB4,EPHA10	-3.00617	0.11876	0.00326948	0.386053
JAK2,PTK6	-4.13785	0.202366	0.130651	0.385419
MERTK,BLK	-5.37699	-0.17789	0.423313	0.385208
FGFR3,EPHB1	-3.51399	-0.0536396	0.0140798	0.384892
PDGFRB,BLK	-4.30006	-0.19925	0.107349	0.384576
ABL1,ERBB4	-4.91564	0.207715	0.18184	0.38426
RET,PTK2B	-3.48039	-0.551249	0.254847	0.38321
DDR2,EPHA6	-6.83115	-0.0501194	1.7693	0.383105
TXK,EPHB1	-4.47912	0.305181	0.094744	0.382371
AXL,ERBB3	-5.5661	1.47849	0.638839	0.382161
EPHB6,NegCon	-1.88775	-0.448797	4.34316e-05	0.381743
FLT4,PTK6	-5.09091	-0.446381	0.238147	0.381638
HCK,EPHA3	-5.31699	-0.31611	0.576426	0.381324
JAK3,INSR	-5.2229	0.0152659	0.550367	0.38122
LYN,HCK	-7.56821	-0.22924	1.44612	0.380072
FGR,EPHA5	-3.99748	-0.410041	0.0166895	0.379864
JAK1,NegCon	-2.8388	-0.517793	0.00156628	0.37976
FGFR1,FES	-5.0788	-0.034047	0.320663	0.379448
ABL1,FGFR1	-3.50581	-0.416748	0.608712	0.379136
MET,ROS1	-4.71785	0.0013843	0.160585	0.378928
EPHA8,TEK	-3.09544	-0.350861	0.0219565	0.378928
KDR,EPHB1	-3.87087	-0.370785	0.0258108	0.37789
LYN,PTK6	-6.804	0.155353	1.04808	0.377372
FGFR2,BLK	-4.20081	-0.335276	0.183427	0.376854
PDGFRA,NTRK3	-4.71403	-0.371332	0.412289	0.376647
ALK,EPHA6	-5.94903	0.0731029	0.7597	0.375821
KIT,NTRK1	-5.63081	-0.292073	0.462307	0.375512
PDGFRA,EPHA8	-4.23196	-0.362911	0.0559617	0.375409
CSK,PDGFRA	-3.88352	-0.19043	0.108574	0.37479
PDGFRA,EPHB6	-4.90966	-0.381611	0.301465	0.374585
EPHA7,EPHA8	-3.23089	-0.196545	0.00612309	0.374276
EPHA8,NTRK3	-2.68383	-0.0143188	0.00169706	0.373762
JAK2,NegCon	-1.83805	-0.434568	0	0.373557
FGFR4,PTK6	-4.61656	0.0449547	0.120847	0.372737
EPHA10,EPHA3	-3.75216	0.200466	0.0897492	0.372634
MET,ABL2	-4.63833	0.107488	0.183692	0.372634
MET,ERBB3	-3.03925	1.72029	0.010061	0.372532
EPHA3,NegCon	-2.30808	-0.480534	0.00771165	0.372327
NTRK1,NTRK1	-4.05998	0.311453	0.0391964	0.372122
FGFR4,TNK2	-5.00208	-0.271622	0.298259	0.371918
CSK,EPHB6	-2.61398	0.0597764	0.0068284	0.371509
TYK2,SRMS	-3.65359	-0.19727	0.00643152	0.371407
YES1,EPHA10	-5.79676	-0.0218253	0.306273	0.370692
YES1,TYK2	-6.81388	-0.042059	1.05616	0.370387
EPHA4,ERBB3	-3.82546	1.37178	0.0490513	0.370285
CSF1R,EPHA8	-2.66477	-0.601775	0.00379489	0.370081
FES,EPHA8	-4.98356	-0.147588	0.657775	0.369979
FYN,TNK1	-4.93005	-0.132795	0.236497	0.369877
FGFR4,TYRO3	-4.0849	0.204951	0.0264104	0.369165
BMX,EPHA1	-1.92576	0.0220358	4.34316e-05	0.369064
WEE1,MST1R	-12.0152	-0.146923	5.76955	0.369064
BLK,TNK2	-4.34878	-0.152427	0.297914	0.369064
FYN,ERBB3	-5.32839	1.43757	0.285251	0.368962
JAK2,MET	-2.8466	-0.0560948	0.004014	0.368658
BLK,EPHB4	-2.9477	-0.212808	0.00471589	0.368455
ERBB3,NegCon	-3.14668	-0.517625	0.445269	0.368049
EPHA5,EPHB3	-5.13604	-0.177592	0.394695	0.367948
MET,JAK1	-3.86516	-0.216638	0.10513	0.367847
ERBB4,SRMS	-3.84414	0.0344835	0.0490999	0.367239
JAK2,LCK	-5.50669	-0.189267	0.380176	0.367239
SYK,TYK2	-4.74562	-0.415968	0.294393	0.366835
FGFR4,EPHA2	-2.25882	-0.331964	0.00287584	0.366431
WEE1,EPHB6	-9.8968	-0.0644974	4.62342	0.366027
CSK,TNK2	-3.72054	-0.182724	0.143332	0.366027
FYN,NTRK3	-4.84849	-0.0463339	0.234928	0.365825
FLT4,FLT4	-4.55607	0.0423838	0.193956	0.365724
HCK,TNK1	-4.75897	-0.302684	0.135311	0.364818
FGFR4,EPHB6	-3.96904	-0.250838	0.0887891	0.364215
EGFR,PTK2	-11.2544	-0.194203	5.27572	0.364114
LYN,SRC	-9.35572	0.212997	3.30321	0.363813
ROS1,FES	-7.58427	-0.120749	2.00842	0.363512
FGFR3,PTK2	-11.7424	-0.240314	6.69897	0.363512
DDR1,EPHB3	-3.90034	0.0938424	0.051196	0.363312
TNK2,NTRK2	-4.58239	-0.114589	0.406492	0.363211
TYRO3,BLK	-3.79039	-0.361941	0.0227338	0.363211
DDR2,EPHB1	-4.34467	-0.345146	0.0844946	0.36221
FGFR1,SRC	-6.49828	-0.217636	1.11993	0.36211
CSF1R,WEE1	-9.54778	-0.189649	3.01408	0.36191
LYN,EPHA1	-6.07138	-0.248877	0.796423	0.361611
SRC,NTRK2	-6.85051	0.0165548	2.52622	0.360115
MET,NTRK1	-3.30063	-0.151257	0.00200236	0.360016
EGFR,MST1R	-5.1331	-0.301301	0.452841	0.359519
WEE1,EPHA7	-10.027	0.117465	3.8962	0.358724
BMX,EPHA6	-4.7537	-0.100986	0.243744	0.358526
DDR2,EPHA4	-4.12463	-0.0466286	0.0143041	0.358229
MET,EPHA1	-2.74544	-0.11085	0.000304113	0.357931
TYK2,TNK1	-4.30742	-0.0555024	0.0223221	0.357239
HCK,EPHA4	-4.96564	-0.460132	0.276955	0.357239
SRC,TXK	-8.17418	-0.106578	3.45186	0.35714
BMX,PTK6	-2.77722	0.248486	0.00432094	0.356547
DDR1,NTRK3	-2.33008	-0.209126	0.00178427	0.356449
EPHA6,NTRK1	-6.63437	-0.160786	1.33498	0.355956
ERBB3,PTK2B	-3.15483	1.5539	0.0156978	0.35566
YES1,ERBB3	-5.77235	1.72871	0.431329	0.355463
BTK,JAK2	-2.94604	-0.232642	0.000347575	0.355463
MERTK,NTRK3	-5.34041	0.0109562	0.381534	0.354774
FGFR4,EPHA4	-3.91403	-0.233507	0.0130045	0.354578
BLK,ERBB4	-4.68361	-0.327087	0.140862	0.354185
JAK1,TNK2	-5.50347	-0.12376	0.667764	0.353106
TXK,INSR	-5.08342	0.00911966	0.379552	0.352911
SYK,EPHA4	-3.67783	-0.309287	0.00515515	0.352715
PDGFRA,EPHA3	-5.07955	-0.00658625	0.926648	0.352519
JAK2,JAK3	-4.80155	-0.0804149	0.312114	0.352324
TYK2,FES	-6.50299	0.00651983	1.49675	0.352031
JAK1,ERBB4	-5.47543	0.307301	0.677988	0.351835
FLT4,EPHA7	-4.29801	0.0474521	0.173083	0.351542
MERTK,PTK2	-13.6852	0.0423084	7	0.351445
KIT,FGFR4	-5.64223	-0.362741	0.974285	0.350957
TEK,NegCon	-1.96535	-0.459781	0	0.350665
DDR1,PTK6	-3.39434	-0.364878	0.0195421	0.34979
FLT4,FGR	-4.47711	-0.215271	0.0181361	0.349692
MET,CSK	-2.07623	-0.22445	8.68676e-05	0.349401
FGR,DDR2	-4.59802	-0.257847	0.182501	0.349207
LYN,TYRO3	-6.4424	0.0477517	0.713095	0.348528
ABL1,NTRK3	-3.72009	-0.232726	0.0547777	0.34756
KDR,EPHA7	-3.92377	0.099079	0.0290026	0.34727
JAK1,INSR	-4.91321	-0.152589	0.169604	0.347077
SRC,EPHB4	-6.45026	-0.0044394	1.32212	0.346981
EPHB1,NegCon	-1.8884	-0.444237	0	0.346787
FLT1,EPHB3	-5.79164	-0.0281797	0.687611	0.346305
TYRO3,FES	-6.06715	-0.211763	0.825068	0.346209
FGFR4,EPHB4	-3.49533	-0.113869	0.0372993	0.346112
YES1,LCK	-7.94924	-0.133248	1.71965	0.346016
KDR,NegCon	-2.09063	-0.48975	4.34316e-05	0.34592
MET,TNK1	-2.85105	-0.320616	0.000217202	0.345727
JAK2,ERBB4	-4.78154	-0.15335	0.232696	0.344381
INSR,PTK2	-11.6056	0.344732	7	0.34419
MET,SRMS	-1.96677	0.152433	0	0.342657
HCK,ERBB4	-6.03611	-0.0845052	0.589391	0.341321
KDR,ALK	-3.62414	-0.150457	0.0109954	0.341035
LYN,DDR1	-4.97387	0.0237423	0.310247	0.34094
EPHA10,ERBB4	-4.67431	0.0203964	0.11053	0.340559
BTK,NTRK2	-2.8506	0.109962	0.0090399	0.340464
JAK1,TXK	-5.53891	0.0648319	1.15304	0.339324
FGFR4,ERBB4	-5.24769	-0.296992	0.319664	0.338661
BTK,ALK	-2.97086	-0.539801	0.0232833	0.338661
TYRO3,PTK2	-11.7895	0.111527	7	0.337998
NTRK1,NTRK2	-3.8096	0.12229	0.0276583	0.337525
PDGFRA,FGR	-5.03158	-0.0848952	0.244964	0.337337
SRC,EPHA8	-6.32378	-0.214059	1.44977	0.337337
FLT3,FLT4	-5.5327	-0.115928	0.859806	0.336959
RET,EPHB1	-3.72778	0.177568	0.575445	0.336865
PDGFRA,EPHB3	-6.3463	-0.175847	0.853252	0.336582
FGFR1,EPHA6	-5.5495	0.154722	0.38637	0.336393
KDR,ERBB2	-3.68236	0.0418622	0.0220022	0.336299
PDGFRA,TNK2	-5.58002	0.196605	0.524184	0.336205
BTK,WEE1	-9.12467	0.0528561	3.10591	0.336205
BLK,INSRR	-2.89023	-0.240535	0.000260655	0.336017
FES,SRMS	-4.61232	0.103869	0.444301	0.335922
WEE1,NTRK1	-10.3388	-0.118727	4.46218	0.335546
JAK2,TNK1	-3.39801	-0.193203	0.00243888	0.33517
MET,PTK2	-10.8193	-0.0214225	6.22185	0.334701
KDR,BLK	-3.60016	-0.32049	0.0184985	0.334701
BLK,EPHB2	-3.22033	-0.257824	0.0340461	0.334513
AXL,EPHB2	-5.1717	0.0349556	0.425506	0.334138
FLT4,SYK	-4.08697	0.0176396	0.0338583	0.334044
BLK,ERBB3	-3.46035	1.5723	0.0158779	0.333576
FLT4,DDR1	-3.00825	-0.0945801	8.68676e-05	0.332921
TNK2,SRMS	-3.6797	-0.0799443	0.00660786	0.332734
JAK3,PDGFRA	-5.91486	0.124527	0.50404	0.33264
FLT4,EPHB2	-3.90704	-0.027708	0.207889	0.332454
JAK1,EPHA3	-4.83492	-0.0490404	0.862646	0.332267
FGFR1,EPHA8	-2.52171	-0.364836	0.000347575	0.332174
KIT,YES1	-7.62669	-0.19868	2.31515	0.331987
EPHA3,EPHB2	-3.72786	0.0529252	0.0972359	0.331428
PDGFRA,SRC	-7.9625	0.118708	2.49013	0.330311
FLT3,EPHA2	-3.25106	-0.11926	0.00440868	0.330311
SYK,FRK	-3.58913	-0.135397	0.0277509	0.32994
DDR2,ERBB3	-4.33097	1.67968	0.228633	0.329847
ABL1,FLT1	-4.52009	-0.00351699	0.323764	0.32929
FYN,ERBB4	-6.38501	-0.183425	0.691863	0.329198
RET,NTRK3	-3.60496	0.0412898	0.206838	0.329105
FGR,WEE1	-10.3179	-0.163019	3.83327	0.329012
EGFR,NTRK1	-3.39959	0.12426	0.00590291	0.328549
SYK,NTRK1	-3.99061	-0.110015	0.0230085	0.328457
TYK2,NTRK3	-4.25791	-0.0311078	0.0754623	0.328179
PDGFRB,EPHB2	-4.26492	0.033742	0.0903905	0.327533
FLT1,EPHA6	-6.68842	0.272113	2.02379	0.327164
TYRO3,EPHA7	-4.2079	-0.0789985	0.0764969	0.327164
FLT1,AXL	-6.16145	-0.139071	1.04158	0.327164
INSR,SRMS	-2.92729	0.291016	0.00222057	0.327071
TXK,DDR1	-3.61065	-0.0699331	0.0470139	0.326518
FLT1,TYK2	-5.20215	-0.0900433	0.404835	0.326058
AXL,HCK	-6.5732	0.0426863	1.02	0.325874
EPHA1,SRMS	-2.51934	-0.110486	0.000304113	0.325782
NTRK2,NegCon	-1.88665	-0.448454	0	0.325414
EPHA6,NTRK3	-5.91983	0.0544197	0.873869	0.324772
DDR2,INSRR	-3.52831	0.294134	0.000651931	0.324313
JAK2,PTK2	-11.3351	0.103043	6.69897	0.324038
MET,FGFR1	-2.4115	-0.070543	0.000260655	0.324038
FLT1,MST1R	-6.00307	0.175771	0.921181	0.323855
INSRR,NTRK3	-2.98382	-0.301268	0.00283213	0.323672
EPHA2,EPHB4	-1.43791	-0.0369552	0	0.323124
EPHA4,EPHA7	-3.89452	-0.28742	0.0775341	0.323032
KDR,EPHA2	-2.0792	-0.243891	0.0010871	0.322302
PDGFRA,ERBB3	-5.03624	1.3754	0.320209	0.321209
PDGFRB,ITK	-4.92475	-0.0994561	0.501965	0.321209
CSK,DDR1	-1.66425	-0.276433	0.0072698	0.321118
JAK2,EPHA7	-3.88255	-0.280123	0.0234666	0.320936
SYK,EPHB6	-3.58796	-0.0534875	0.0297461	0.320663
FGFR4,HCK	-5.04303	0.0532371	0.353106	0.317855
EPHA10,MST1R	-5.33584	-0.00500955	0.592949	0.317855
EGFR,TXK	-4.34472	-0.165008	0.0322181	0.317855
JAK3,BLK	-4.52014	0.0477956	0.107293	0.317584
FGR,NegCon	-2.211	-0.492109	0	0.317404
INSR,LCK	-5.78681	0.131262	0.491201	0.316863
MET,ERBB4	-4.22896	-0.234158	0.0403386	0.316233
FLT1,WEE1	-10.5936	0.0103941	4.16368	0.316143
EPHA6,EPHB2	-5.98547	0.0126312	0.517126	0.315065
FGFR1,EPHA7	-3.32556	-0.0541363	0.0175931	0.314796
KDR,EPHB6	-3.88965	-0.415016	0.59176	0.314796
MET,MERTK	-4.9573	-0.132282	0.537452	0.313632
BLK,NTRK2	-3.33973	-0.192258	0.00300702	0.313453
PDGFRB,EPHA2	-2.83688	-0.256672	0.000173753	0.313453
DDR1,EPHA10	-2.41087	-0.0574703	0	0.313364
MERTK,SRC	-9.03709	-0.0573412	3.48135	0.313274
TYK2,DDR1	-3.34513	0.00209926	0.00296329	0.312739
TYRO3,ERBB3	-4.0782	1.68547	0.0487111	0.312649
FLT1,ITK	-4.65038	0.00311863	0.391688	0.312649
MET,EPHA10	-2.88626	-0.153901	4.34316e-05	0.311936
EPHA8,PTK2	-10.752	0.0371131	6	0.311669
WEE1,FES	-12.2241	-0.168859	4.91364	0.311135
PDGFRB,HCK	-5.79963	-0.213178	0.534171	0.311047
HCK,EPHB3	-6.34035	-0.0616378	1.10144	0.310602
SRC,BLK	-6.62862	-0.0455495	1.89928	0.310247
BLK,NTRK1	-3.65163	-0.0726139	0.0239712	0.310247
PDGFRB,AXL	-6.19753	0.148475	1.53447	0.310159
INSR,BLK	-3.76062	-0.201004	0.0875122	0.310159
FRK,EPHA3	-4.2677	-0.801808	0.145815	0.31007
JAK2,EPHB4	-3.14376	-0.179273	0.0168701	0.309893
PDGFRA,DDR2	-5.22508	0.154451	0.257039	0.309538
JAK2,YES1	-5.87309	-0.14364	0.49853	0.30945
FRK,DDR1	-2.44706	-0.127731	4.34316e-05	0.308919
EPHB4,NTRK3	-2.91468	0.015814	0.0146184	0.30883
BLK,FGR	-3.62794	-0.147211	0.00691664	0.308653
JAK3,FGFR4	-5.04372	0.180652	0.103474	0.308565
SRC,NTRK1	-7.36224	-0.15704	2.86487	0.308388
JAK2,NTRK3	-3.43135	-0.342338	0.0108172	0.3083
RET,NegCon	-2.21171	-0.492291	0.178683	0.307682
KDR,EPHB3	-5.23663	0.00967306	0.717831	0.307594
PDGFRA,EPHA5	-4.8387	-0.292122	0.486516	0.307417
INSR,EPHA6	-6.63288	-0.0802539	1.60085	0.306273
TYK2,EPHA8	-3.83782	-0.122833	0.0414839	0.306097
BLK,TNK1	-3.21538	-0.257251	0.00296329	0.305307
MET,TXK	-3.91067	0.1805	0.0299322	0.304869
DDR1,NegCon	-0.74048	-0.123377	0	0.304693
ITK,SRMS	-3.0915	-0.0490637	0.00104356	0.304256
FLT3,FES	-6.93789	0.0939843	1.8216	0.303644
EPHA10,NTRK1	-3.89041	-0.135145	0.0140349	0.303644
JAK2,EPHA1	-3.26929	0.0431872	0.00270101	0.303469
EPHA2,FES	-3.84797	-0.0474957	0.00806545	0.303032
EPHA3,NTRK3	-3.74545	-0.0648325	0.057149	0.302858
TXK,NTRK1	-5.03659	-0.00104297	0.198391	0.302596
BLK,ERBB2	-3.35137	-0.208865	0.0213631	0.302248
ABL1,ABL2	-5.61831	0.0705589	0.615467	0.301986
EPHA8,EPHB3	-4.2655	0.214862	0.0740179	0.301291
JAK1,EPHA4	-4.31528	0.0906645	0.0776898	0.301204
NTRK3,NegCon	-1.68748	-0.38455	0	0.300856
EPHA2,DDR1	-0.816084	-0.175879	0	0.300683
BTK,ERBB3	-3.2195	1.46566	0.0214999	0.300422
SYK,PTK2	-11.3705	0.17419	6.69897	0.299989
JAK1,EPHB6	-4.38074	0.0451342	0.263603	0.299642
EPHA10,NTRK2	-3.49285	-0.0743571	0.000869459	0.299296
SRMS,NegCon	-0.966268	-0.206371	0	0.299123
KDR,TNK2	-4.73996	-0.0525434	0.90763	0.299037
CSK,EPHA7	-2.94334	-0.0584136	0.0068284	0.298864
EPHA2,NTRK1	-2.21893	-0.126467	0.000130308	0.297828
BMX,ERBB3	-2.18924	2.34306	8.68676e-05	0.297742
ABL1,EPHB6	-3.83561	-0.0696433	0.0694075	0.297742
FGFR4,TYK2	-4.74707	0.0374805	0.145937	0.297656
MET,EPHA8	-2.26071	-0.0845469	0.000130308	0.297656
YES1,PTK6	-6.54576	0.17177	0.918653	0.297397
TYRO3,SRMS	-3.00775	0.00411347	0.00100003	0.297397
FGFR4,FGR	-4.22135	-0.123957	0.231362	0.297397
ERBB4,MST1R	-6.58229	0.0888519	1.90728	0.297311
EPHB6,NTRK2	-3.48813	0.0376854	0.0318908	0.296967
KIT,EPHA10	-5.03498	-0.0130884	0.18039	0.295935
KDR,FGFR2	-4.48557	-0.0493523	0.212115	0.295764
PDGFRA,PTK2	-12.4343	0.325222	7	0.29465
JAK3,PTK2	-12.6891	0.2211	7	0.294564
FES,EPHA6	-8.239	0.0302819	3.91045	0.294307
KDR,NTRK3	-3.49775	0.0251752	0.00713733	0.294222
JAK2,EPHB2	-3.28956	0.0482643	0.0429677	0.294051
INSR,EPHA2	-2.12921	0.268008	0.000173753	0.293709
PDGFRB,FLT1	-5.03655	0.215934	0.406936	0.293624
FGFR1,ABL2	-4.79915	0.102107	0.432856	0.293282
SRC,PTK6	-7.50928	0.203578	2.96497	0.293112
FGFR1,LCK	-4.94159	-0.00862915	0.238523	0.292856
FYN,EPHA7	-5.15968	0.266584	0.253833	0.292771
RET,PTK2	-11.593	0.226861	5.36653	0.29243
KDR,DDR1	-2.72622	-0.252553	0.000434512	0.29243
RET,BLK	-3.59973	-0.0876889	0.460171	0.292174
SYK,SRMS	-2.6865	0.0332532	8.68676e-05	0.291919
EPHA1,NTRK3	-3.1795	-0.0690803	0.00252624	0.291069
MET,ITK	-3.37977	-0.182785	0.00555086	0.291069
EPHA6,LCK	-7.98503	0.156744	2.38531	0.290985
PDGFRB,EPHA6	-6.99402	0.152634	1.46005	0.290815
DDR2,NTRK3	-3.86487	0.136998	0.0109954	0.290815
YES1,ERBB4	-7.03437	0.0859306	0.921906	0.290815
FGFR1,NegCon	-1.36603	-0.309457	0	0.290221
JAK3,EPHA8	-4.10794	0.07113	0.0375833	0.290137
ROS1,NTRK3	-5.14848	0.056607	0.281831	0.289375
EPHA8,NegCon	-1.20013	-0.285898	0	0.28929
ERBB4,NTRK3	-4.4694	0.131183	0.197705	0.288952
JAK2,FGFR4	-3.81515	-0.0443416	0.0370154	0.288952
JAK1,ITK	-4.91233	-0.132855	1.01466	0.288868
EPHA7,PTK2	-11.4648	0.324008	7	0.287519
EPHA6,EPHA7	-6.39436	0.067714	1.91507	0.287434
SRC,ERBB4	-7.99257	0.15176	2.99957	0.28735
BLK,NegCon	-1.61628	-0.362633	0	0.287098
TXK,FES	-6.68555	0.0887332	1.92263	0.287014
FGFR1,MERTK	-5.13067	-0.159069	0.704873	0.286762
KDR,FGFR1	-3.17768	0.0659827	0.00379489	0.286341
EPHB1,MST1R	-5.43292	-0.0806133	0.539102	0.285586
JAK2,INSR	-3.90115	-0.0438171	0.0231917	0.285419
FGFR1,EPHA2	-1.34891	-0.0343834	0	0.285251
INSR,ERBB3	-3.87473	2.16596	0.0715017	0.285167
FGFR1,FRK	-2.97247	0.0146521	0.00445255	0.285167
PDGFRB,SRC	-7.77276	0.0615934	3.55611	0.285084
INSR,NTRK1	-4.28387	0.0146896	0.157079	0.284498
FGFR1,TXK	-4.13377	0.0563997	0.0667659	0.284247
SRC,TYK2	-7.65124	0.180429	2.42539	0.28383
PDGFRB,TNK1	-4.07826	0.324378	0.276052	0.283746
CSF1R,INSR	-3.61145	-0.250109	0.0288634	0.283412
EPHA8,EPHA8	-2.22035	0.0163564	0.0015227	0.283162
SRC,EPHA4	-6.6174	0.276936	2.03007	0.282829
FLT3,NTRK3	-4.62144	0.189551	0.209293	0.282829
WEE1,SRMS	-9.12531	-0.228013	2.85294	0.282829
EPHB3,TNK1	-4.79325	0.174346	0.114922	0.282496
TYK2,NTRK1	-4.63901	0.289833	0.16317	0.282329
ABL1,TNK1	-3.5603	0.188485	0.101494	0.282163
FGFR2,JAK2	-4.27118	-0.0917589	0.0101943	0.282163
FGFR4,NTRK1	-4.28792	-0.13148	0.0735547	0.281997
DDR1,EPHA4	-2.41705	-0.0447129	0.000304113	0.281747
RET,FES	-5.62997	0.399014	0.503762	0.281664
ITK,NTRK3	-3.73192	0.0291684	0.0277509	0.281332
PTK6,MST1R	-6.09536	0.170418	1.47276	0.281083
PDGFRB,NTRK2	-4.25729	0.297353	0.00616713	0.280835
TYRO3,ERBB2	-3.75004	0.246846	0.0191334	0.280503
ABL2,MST1R	-7.04311	0.291405	2.19125	0.279841
EPHA10,EPHA4	-3.3567	0.128708	0.0013484	0.279675
FGFR4,EPHB2	-3.63204	0.127983	0.0909256	0.27951
TNK1,ERBB4	-4.4011	0.29995	0.148069	0.279345
FGFR4,NTRK3	-3.62134	0.0665086	0.045661	0.279014
DDR1,EPHA7	-2.69399	0.0503106	0.0134074	0.279014
RET,SRC	-7.06852	0.150697	1.14134	0.278437
ERBB2,MST1R	-5.28822	0.16063	0.750313	0.278189
PTK2,ERBB3	-11.5069	1.22018	5.58503	0.277284
WEE1,NTRK2	-9.4254	0.429202	2.84043	0.277119
EPHB4,ITK	-3.47943	0.112217	0.0339522	0.276791
PDGFRB,ROS1	-6.13488	0.28632	0.894831	0.276709
BLK,WEE1	-9.51255	0.0500708	2.55564	0.276298
FGFR4,EPHB3	-5.10909	0.456371	0.385208	0.275724
FGFR1,EPHA10	-2.90831	0.132986	0.000173753	0.275642
SRMS,NTRK1	-3.05617	-0.103667	0.0117979	0.27556
EGFR,CSK	-2.21452	0.0426101	0.00121773	0.275478
EPHA1,NTRK1	-3.7376	-0.0790446	0.00585889	0.275396
MERTK,HCK	-6.81355	-0.0184168	1.28659	0.275315
ROS1,EPHB6	-5.40134	-0.045305	0.422164	0.275151
PDGFRA,NTRK1	-4.88093	0.282436	0.530031	0.274824
JAK3,NTRK2	-4.72889	0.140298	0.244811	0.274415
BLK,EPHA10	-3.15672	0.100717	0.00182788	0.274252
EPHA1,EPHB2	-3.08319	0.222564	0.0245682	0.273599
JAK3,PDGFRB	-5.70196	0.0822326	0.899629	0.273191
BLK,SRMS	-2.28762	0.277102	8.68676e-05	0.273028
TYRO3,FGR	-4.03319	0.244151	0.0432075	0.27254
CSF1R,FES	-5.06037	0.0959699	0.59329	0.271809
FLT4,PDGFRA	-5.31105	-0.163798	0.275724	0.271646
MERTK,ERBB3	-5.72226	1.44232	0.50696	0.271322
EPHA2,ITK	-2.25702	-0.0618659	0.000912977	0.270835
KDR,EPHA1	-3.60229	-0.154308	0.0129597	0.270349
SRC,EPHB3	-8.13586	0.330491	3.12205	0.269864
EPHA3,NTRK2	-3.76173	0.263225	0.045854	0.269622
ERBB3,SRMS	-2.71481	2.26858	0.0009565	0.268734
FLT3,DDR1	-3.70146	0.254858	0.020816	0.268653
JAK2,NTRK1	-3.80914	0.035463	0.0400528	0.268653
EPHA8,NTRK1	-3.207	0.0425158	0.0054629	0.268572
RET,SYK	-3.93793	-0.141798	0.184622	0.268331
JAK1,NTRK1	-4.75032	0.0498942	0.366835	0.26825
NTRK2,NTRK3	-3.2533	0.140436	0.0105947	0.26817
TYK2,EPHA3	-4.74747	0.150797	0.367239	0.268009
ABL1,JAK1	-4.82528	-0.204643	0.343806	0.267928
JAK2,ERBB2	-3.48302	-0.0406726	0.00656377	0.267445
JAK1,PTK2	-12.0079	0.451143	7	0.267285
HCK,EPHB2	-4.73211	-0.247559	0.404945	0.267285
FLT1,ERBB3	-4.26495	1.86929	0.028817	0.266803
FGFR1,BLK	-2.86393	-0.226031	0.00235155	0.265921
WEE1,EPHA1	-9.90084	-0.267571	3.16679	0.265921
CSF1R,LCK	-4.94071	0.0897628	0.258612	0.26576
YES1,EPHB2	-5.50337	0.315613	0.747875	0.26496
FLT4,JAK1	-4.84456	0.182585	0.324038	0.26496
PTK2,INSRR	-10.6943	0.269766	5.82391	0.264721
INSR,NTRK3	-3.62281	0.235422	0.0296531	0.264401
EPHA5,NegCon	-1.87416	-0.449025	0	0.264401
EPHB6,PTK2B	-2.72325	0.441887	0.00296329	0.264162
CSF1R,SRMS	-2.25242	-0.0987145	0.00537495	0.263922
EPHB1,NTRK2	-3.60848	-0.203158	0.00828672	0.263524
EGFR,ERBB3	-3.20642	1.72846	0.0420098	0.262648
EPHA7,ERBB3	-3.76684	2.09308	0.0708366	0.262489
BTK,NegCon	-1.23753	-0.305909	0	0.262489
ABL1,PTK2	-11.6126	0.198369	5.20761	0.26241
KIT,INSRR	-4.53397	0.110596	0.187087	0.26233
RET,DDR1	-2.63096	0.243235	0.111652	0.262171
EPHA8,INSRR	-2.50148	-0.261866	0.00248256	0.261775
JAK2,EPHB1	-3.36241	0.21087	0.00370728	0.261219
MET,FLT4	-3.4106	-0.0231176	0.00353211	0.261061
EPHA2,ERBB3	-1.88805	2.28969	0.00195874	0.260823
CSK,SRMS	-1.94377	-0.511282	0.00235155	0.260349
JAK2,BMX	-1.94449	0.338169	0.000260655	0.260111
TYRO3,DDR1	-2.65864	0.329134	0.00147912	0.259795
DDR1,ERBB4	-3.48925	0.350893	0.012915	0.259322
YES1,EPHA7	-5.94691	0.284271	0.49812	0.259243
FYN,DDR1	-3.89916	0.043383	0.00585889	0.259243
PTK2,NTRK3	-11.0124	0.255994	7	0.259006
FGR,ITK	-4.09802	0.237311	0.250805	0.258218
LYN,EPHA6	-8.67149	0.152878	3.77754	0.258218
EPHB3,ABL2	-6.92403	0.00963138	2.73518	0.25814
DDR1,EPHB4	-1.99083	0.163174	8.68676e-05	0.257825
CSF1R,EPHB3	-4.51642	0.148115	0.267445	0.257118
FRK,FGR	-3.59137	0.373604	0.00449643	0.256804
KDR,INSRR	-3.17637	0.116732	0.0246142	0.255942
JAK1,BLK	-4.0207	0.206237	0.130006	0.255864
DDR2,EPHB6	-3.90564	0.375798	0.111933	0.255785
PDGFRB,WEE1	-10.8587	-0.0196767	3.34833	0.254925
FGFR2,ERBB3	-4.1165	2.22899	0.0529586	0.254847
JAK3,TNK2	-5.66985	0.26954	0.669181	0.254847
TXK,EPHA6	-7.21558	0.143088	1.7469	0.254301
BLK,PTK2	-11.0064	0.19506	6.04576	0.254223
DDR1,EPHB1	-2.3804	0.147515	0.000347575	0.254145
AXL,TYRO3	-5.64544	0.128873	0.491605	0.254067
TYK2,EPHA6	-6.89991	0.267886	1.92191	0.253989
ERBB4,NTRK1	-4.90931	0.341498	0.26512	0.25321
EPHA2,EPHA1	-1.61317	0.12019	0	0.252977
MET,TYK2	-3.67707	0.224948	0.00410168	0.252744
FES,EPHB3	-6.82352	0.436733	2.18869	0.252355
TNK2,ERBB4	-5.63372	0.203086	0.788879	0.2522
PDGFRA,INSRR	-4.18604	0.0205023	0.107349	0.252122
JAK2,ROS1	-5.32006	0.00901662	0.388702	0.251967
AXL,TXK	-6.57146	-0.0629554	1.46852	0.251579
JAK3,ROS1	-6.51572	0.268279	1.12895	0.251502
ABL1,EPHA10	-3.5795	0.349283	0.142366	0.251269
HCK,EPHA7	-4.96688	0.0982626	0.129479	0.251192
FYN,SRC	-8.60535	-0.170146	3.22424	0.251115
MET,EPHB1	-2.69953	0.396259	0.000391041	0.250882
TXK,EPHA8	-3.99885	0.021773	0.0714505	0.250186
FGR,EPHB6	-3.77344	0.0802884	0.110306	0.249955
INSR,EPHA10	-3.64989	0.4396	0.00607904	0.249337
EGFR,FRK	-3.13248	-0.171773	0.0199512	0.248644
FLT3,ERBB4	-6.15307	0.025332	0.680686	0.24849
EGFR,FGFR1	-2.4944	0.286166	0.000217202	0.248028
EPHA1,ERBB4	-4.66331	-0.17424	0.231658	0.248028
MERTK,EPHA6	-8.16163	0.0857246	2.34266	0.247952
RET,NTRK2	-3.79318	0.0393498	0.430275	0.247952
ERBB3,ERBB3	-3.83232	3.34344	0.0728864	0.247567
ALK,FLT4	-3.71172	0.342045	0.00100003	0.247567
JAK2,EPHB3	-4.95607	0.0750227	0.221342	0.247414
YES1,WEE1	-11.7631	0.551992	4.88941	0.246953
ROS1,NTRK2	-5.09105	0.453687	0.45917	0.246953
FYN,EPHA2	-3.14992	0.294966	0.00174066	0.246647
PDGFRB,TYRO3	-4.7809	0.0503189	0.176395	0.24657
MET,PTK2B	-2.30403	-0.0442346	4.34316e-05	0.246417
EPHA8,TNK2	-3.71806	0.292313	0.175744	0.245728
FES,EPHA3	-5.78594	0.298134	0.403953	0.245422
PTK2,ERBB2	-11.2915	0.19548	7	0.245193
RET,FRK	-3.81474	-0.0858945	0.768276	0.245193
TNK1,TNK1	-3.17737	0.0483819	0.006035	0.24504
FLT1,NTRK1	-4.51524	0.125886	0.131297	0.244964
KIT,NTRK2	-4.82435	0.43267	0.472499	0.244583
MET,EPHA7	-3.06565	0.186608	0.0085524	0.244278
BTK,NTRK1	-3.20786	0.117232	0.00691664	0.244278
SRC,ERBB2	-6.88307	-0.0229768	1.80939	0.244049
EPHA7,EPHB6	-3.57781	0.437684	0.0364955	0.243973
KDR,PTK6	-4.48113	0.028855	0.351542	0.24344
AXL,FGR	-5.47207	0.324361	0.490932	0.24268
EPHA3,PTK2	-11.3477	0.575554	7	0.242528
FGFR4,DDR2	-4.34026	0.209956	0.0908721	0.242528
MERTK,EPHA1	-5.30655	0.0932588	0.369572	0.242528
PDGFRB,EPHA7	-4.58425	0.242629	0.197363	0.2423
JAK3,MERTK	-6.56754	0.425198	1.51827	0.241694
PDGFRA,FES	-6.52771	0.322017	1.77083	0.241467
FES,ERBB3	-5.52476	1.74478	0.827689	0.241239
TYRO3,EPHB6	-3.73242	0.278307	0.0339991	0.24071
JAK2,EPHA10	-3.26549	0.293277	0.00305075	0.240408
BTK,RET	-3.01631	0.410382	0.352324	0.239955
ALK,HCK	-4.37948	0.34667	0.0748427	0.239879
FYN,ITK	-5.16482	0.465632	0.3534	0.239804
INSR,EPHB3	-5.24571	0.376412	0.737786	0.239427
EGFR,EPHA7	-3.29884	0.154202	0.00388252	0.239201
TYRO3,LCK	-5.88079	-0.109929	0.832978	0.238824
EPHA2,NTRK3	-1.58499	0.159804	0.000260655	0.238373
DDR2,EPHA3	-4.57056	-0.0636284	0.180259	0.238373
FGFR2,PDGFRB	-5.12002	0.138068	0.815025	0.238147
KIT,EPHA7	-5.07867	0.466698	0.179864	0.237997
FGFR2,MET	-3.64825	-0.0654907	0.0121104	0.237772
RET,FLT4	-4.33247	0.0300878	0.170118	0.237547
ITK,LCK	-5.76185	0.184995	0.424235	0.237321
JAK2,DDR1	-2.36314	0.0719557	4.34316e-05	0.236572
EPHA10,PTK2	-11.3531	0.0841388	5.31876	0.236497
ROS1,DDR2	-5.85455	0.248919	0.738737	0.236422
EPHA4,LCK	-5.54641	-0.235182	0.597051	0.236422
JAK3,RET	-4.90108	0.376531	0.209012	0.236198
MERTK,EPHB6	-5.36573	0.287562	0.575935	0.235973
BMX,DDR2	-2.79793	-0.192241	0.0009565	0.235749
ITK,INSRR	-3.48354	-0.0391201	0.0105947	0.235674
FGFR3,DDR2	-3.8626	0.410004	0.00559485	0.234853
FLT1,CSF1R	-3.71354	0.146078	0.0121997	0.234034
EPHB4,DDR2	-3.76893	-0.0769536	0.113002	0.234034
BLK,BMX	-1.8496	0.00428754	0	0.233885
DDR2,TNK1	-3.63821	0.57796	0.000521466	0.233215
KIT,TXK	-6.2571	0.00102183	1.23523	0.233215
PDGFRB,RET	-4.58581	0.299793	0.203981	0.233067
FYN,BMX	-3.30234	0.592349	0.00793274	0.232844
ROS1,EPHB2	-4.93514	0.498051	0.603626	0.232696
ABL2,PTK6	-6.43161	-0.423338	1.26328	0.232696
MERTK,NTRK2	-5.35754	0.29972	0.615288	0.232621
EPHB2,PTK6	-3.86659	0.462259	0.0962049	0.232399
FLT4,MST1R	-5.94822	-0.0284728	1.44782	0.23151
EGFR,YES1	-5.29722	0.180252	0.357338	0.231362
EPHB4,LCK	-4.89343	0.234754	0.176917	0.231288
FLT1,SYK	-4.16579	0.178459	0.125112	0.231288
CSK,EPHA4	-2.63443	-0.0843782	0.0222764	0.230327
EPHA8,EPHB2	-2.79609	-0.186458	0.0394817	0.230327
EPHB1,EPHB2	-3.22662	0.269337	0.0453716	0.230254
SRMS,NTRK2	-2.50367	0.336577	0.000130308	0.229885
EPHB3,ERBB3	-5.0256	1.93049	0.410162	0.229811
FGR,TEK	-3.96541	-0.152754	0.0187705	0.229148
EPHB6,SRMS	-2.37111	0.650457	0.0009565	0.228633
SYK,EPHA7	-3.7124	0.261506	0.109244	0.227678
FLT1,NTRK2	-4.02612	0.320584	0.0245682	0.227605
RET,TXK	-4.93594	0.0670411	0.411728	0.227605
INSR,ITK	-4.3207	0.0594194	0.135133	0.227312
INSR,ERBB4	-4.95996	0.355899	0.212894	0.227238
FGFR3,EPHB4	-3.11803	-0.064857	0.0163286	0.226799
FGFR3,KIT	-4.85178	0.355702	0.410833	0.226506
TXK,BLK	-4.22256	0.307008	0.0585383	0.22614
JAK1,ERBB3	-4.46643	1.87064	0.158078	0.226067
FGFR4,MERTK	-5.90995	-0.0460201	0.888737	0.225994
ITK,EPHA1	-3.52557	0.492235	0.00638744	0.22541
MERTK,EPHA7	-5.63208	0.326528	0.735182	0.225264
DDR1,DDR2	-3.15762	-0.230675	0.0009565	0.225264
FGFR3,ERBB4	-4.5504	0.286575	0.125808	0.225191
FGR,MST1R	-5.59808	0.163271	1.09577	0.224681
CSK,FGFR1	-2.24703	-0.260782	0.00174066	0.224535
JAK3,AXL	-6.60631	0.101558	2.00393	0.224462
FLT3,EPHA10	-4.69725	0.30767	0.413525	0.224244
PDGFRA,ERBB2	-4.5355	0.227484	0.189969	0.22388
INSR,FGR	-4.10295	0.212203	0.179864	0.223662
KIT,FGFR1	-4.59658	-0.0302382	0.59329	0.223589
MET,DDR1	-1.71372	0.304149	4.34316e-05	0.223081
FGR,ERBB3	-3.72848	2.18579	0.0432555	0.222936
KIT,PDGFRB	-5.9754	0.0788296	1.33217	0.222791
JAK1,EPHA7	-4.56098	0.217893	0.152489	0.222646
EPHB6,PTK2	-11.3003	0.185388	7	0.222646
FGFR4,EPHB1	-3.74135	0.195388	0.102703	0.222501
INSR,PTK6	-4.63913	0.160875	0.198802	0.222356
EGFR,PDGFRA	-4.18355	0.115953	0.180719	0.222066
FGFR2,AXL	-6.43499	-0.507047	0.954677	0.222066
MET,CSF1R	-2.28435	0.398742	0.00117418	0.221849
FLT3,EPHA1	-4.77145	-0.0524034	0.277695	0.221559
FES,DDR2	-6.29182	-0.142516	1.27968	0.221559
JAK1,EPHB2	-4.11644	0.23032	0.16845	0.221487
SRC,INSRR	-6.40838	-0.0494851	0.824778	0.221053
KDR,EPHA4	-3.58066	0.176202	0.0157428	0.220909
EPHA2,TEK	-1.89744	-0.0301175	0	0.220909
EPHA4,PTK6	-4.24482	0.0383866	0.0167346	0.220837
EGFR,DDR2	-3.61184	0.225274	0.00709318	0.220548
FES,NTRK2	-5.52348	0.0607033	0.994819	0.220331
MERTK,SRMS	-4.47575	0.294794	0.184622	0.220259
BMX,EPHA8	-1.34132	0.423146	0	0.220187
PDGFRB,PTK2B	-3.6362	0.405024	0.00515515	0.219107
FGFR4,EPHA7	-3.99931	0.208387	0.0525173	0.218819
BLK,EPHB3	-4.6272	0.290981	0.223299	0.218676
FGFR2,FLT1	-4.79721	0.321722	0.374276	0.218245
DDR1,EPHA3	-2.69013	0.316682	0.0101054	0.218245
FGFR4,ITK	-4.0716	0.327282	0.0568024	0.217742
EGFR,NTRK3	-2.72844	0.407245	0.000260655	0.217169
TXK,TYK2	-5.42432	0.287788	0.391688	0.217098
FGFR1,NTRK1	-3.28583	0.194462	0.0120211	0.217098
ROS1,NTRK1	-5.5325	0.357357	0.573977	0.216454
TYRO3,CSF1R	-3.44108	-0.00470476	0.0193604	0.216454
INSR,EPHB2	-3.70478	0.148997	0.107127	0.216168
ABL1,TNK2	-4.74567	0.123607	0.239578	0.216025
PDGFRB,TEK	-4.45957	0.0864177	0.193413	0.215811
BTK,BMX	-1.31795	0.749447	0	0.215525
PDGFRB,INSR	-4.70632	0.273088	0.262728	0.215311
FLT1,SRMS	-3.15621	0.404677	0.00397017	0.215169
CSK,EPHA1	-2.40141	0.175359	0.00594694	0.215026
CSK,EPHA8	-1.88647	0.372334	0.00375108	0.214813
EPHA2,SRMS	-0.858863	0.439246	0	0.21467
FGFR2,RET	-4.54988	0.0361434	0.785686	0.214528
FLT4,FGFR1	-3.50507	0.0935311	0.00952795	0.214457
TYRO3,FYN	-5.29072	0.15964	0.399027	0.214314
CSK,EPHB4	-2.25601	-0.0320811	0.00226422	0.213959
ABL1,LCK	-5.72936	0.0174402	1.16813	0.213888
ABL1,ERBB2	-3.77539	0.0621987	0.0775341	0.213533
ABL1,EPHB2	-3.74408	-0.198642	0.467118	0.212965
EPHB4,EPHB6	-2.88333	0.505815	0.0109508	0.212752
MET,FGR	-3.12452	0.100826	0.00056495	0.212752
FLT3,YES1	-7.18567	0.125989	0.778847	0.212469
FLT1,TXK	-5.21199	0.285588	0.20621	0.212256
IGF1R,FGR	-5.11911	-0.722602	0.583193	0.211973
RET,EPHA5	-3.66025	0.291533	0.459295	0.211619
EPHA2,NegCon	-0.0685817	0.132234	0	0.211549
ALK,SRMS	-2.37426	0.330948	0.0206338	0.211407
FLT1,BLK	-3.96665	-0.00527713	0.0138107	0.211054
SYK,NTRK3	-3.25529	0.242255	0.00899556	0.210631
FLT3,BMX	-3.15713	0.675843	0.0142593	0.210208
ALK,EPHA1	-3.03635	0.326592	0.00775586	0.209926
FGFR4,EPHA10	-3.71799	0.152638	0.0142144	0.209574
PDGFRB,ABL2	-6.10619	0.30314	1.07479	0.209433
ALK,FLT1	-3.84537	0.383818	0.00634337	0.209293
TYK2,ERBB4	-5.55914	0.201614	0.38426	0.208801
ITK,FES	-5.89012	0.171299	0.92336	0.208801
FES,MST1R	-7.1848	0.332431	1.79724	0.208731
CSK,PTK2B	-1.90351	0.470809	0.00160987	0.20852
TXK,ERBB3	-4.70642	1.89535	0.233364	0.208099
DDR2,NTRK1	-4.46329	0.0628886	0.0217282	0.208099
EPHB2,NTRK1	-3.54255	0.376564	0.0534986	0.207819
KIT,ERBB3	-4.96717	2.01086	0.443095	0.207608
DDR1,TNK1	-2.14924	0.356594	4.34316e-05	0.207328
MET,PTK6	-3.65466	0.0126932	0.0234208	0.207328
SRC,EPHB2	-6.6427	0.0931589	1.6834	0.207048
AXL,TNK2	-6.31371	0.0935255	0.869666	0.206629
ABL1,FGR	-4.15028	-0.0691422	0.105795	0.206629
EPHA8,SRMS	-1.88731	0.39528	0.00283213	0.206559
PDGFRB,FGFR4	-4.63567	0.257627	0.159957	0.206349
TXK,TNK1	-4.2446	0.432188	0.0733489	0.20593
EPHA8,TNK1	-2.72565	-0.0352176	0.00230788	0.205791
JAK2,EPHA8	-2.6539	0.383824	0.00252624	0.205651
FGFR1,TYK2	-3.70613	0.400348	0.00762324	0.205512
INSR,EPHB6	-3.78887	0.240202	0.158515	0.205164
EPHA2,DDR2	-2.47143	-0.10992	8.68676e-05	0.205164
ALK,WEE1	-9.53514	0.149139	2.83803	0.205094
SRC,EPHA10	-6.51026	0.403741	1.69702	0.204885
EPHA2,PTK2	-9.29198	0.369755	3.68069	0.204468
FGFR4,ABL2	-5.5134	0.30976	1.13829	0.204398
EPHA2,EPHA7	-1.89843	0.580318	0.000260655	0.204259
SRC,EPHA2	-4.89029	0.362407	0.480829	0.20412
JAK1,SRC	-7.68487	0.122169	2.77702	0.203634
FLT1,NTRK3	-3.91391	0.200882	0.0214087	0.203495
FLT1,FGFR4	-4.59826	-0.0710949	0.122398	0.203356
INSRR,TEK	-3.08296	0.0673786	0.0354104	0.203079
KIT,TYRO3	-5.4018	0.0818407	0.675512	0.202248
FGFR1,FYN	-4.52776	-0.0198243	0.0809742	0.201971
SRMS,SRMS	-1.68251	0.374164	0.00056495	0.201902
PDGFRA,ABL2	-6.41828	0.192706	0.723079	0.20128
KDR,SRMS	-2.59201	0.564066	0.0013484	0.200866
EPHA10,TNK2	-4.25116	0.347776	0.221415	0.200659
BTK,LCK	-4.65431	0.293676	0.130416	0.200315
EPHA6,EPHB1	-5.86952	0.429972	1.16986	0.199902
ALK,SYK	-3.37617	0.0761823	0.0109954	0.198665
FGFR1,ROS1	-4.84321	0.0526932	0.24382	0.198596
ALK,PTK2	-11.0241	0.286028	6	0.198185
FGFR3,FLT3	-4.88135	0.0268868	0.300509	0.198185
EPHA6,ERBB3	-5.90395	1.65349	1.00529	0.197705
EPHA7,INSRR	-3.09159	0.498218	0.0124231	0.197568
EPHA3,TNK2	-4.57475	0.603696	0.164246	0.197432
MERTK,EPHB1	-5.29999	0.396836	0.427477	0.196816
EPHA1,EPHA8	-2.61342	0.190215	0.00287584	0.196748
FES,NTRK3	-5.28169	0.140394	0.469928	0.196406
FGFR2,LCK	-6.00719	0.32002	0.447819	0.195315
RET,FGR	-3.99681	0.202494	0.0656531	0.195179
BMX,EPHB4	-1.62315	0.288205	0.000130308	0.194839
FGR,NTRK1	-4.0756	0.170769	0.0400052	0.194771
IGF1R,TYRO3	-3.93099	1.59047	0.249106	0.194227
SRC,ERBB3	-6.65718	1.45552	1.30112	0.194227
LYN,FRK	-6.04624	0.0113877	0.865186	0.194092
FGFR1,ITK	-3.26031	0.374994	0.0232375	0.194024
JAK1,SRMS	-3.39989	0.27451	0.368658	0.194024
MERTK,EPHB4	-5.02786	0.177899	0.565271	0.193616
AXL,NTRK2	-5.11151	0.382274	0.205582	0.193549
KIT,FRK	-5.27443	-0.410389	0.708187	0.193142
PDGFRA,FYN	-6.29004	-0.140991	1.16437	0.193074
LYN,NTRK1	-6.11365	0.541909	0.937042	0.192465
FGR,PTK6	-4.36456	0.429296	0.117703	0.192194
CSK,LCK	-4.43841	0.186072	0.286174	0.191924
DDR1,TNK2	-3.27152	0.319748	0.00594694	0.191451
FES,EPHA7	-5.65626	0.32518	1.26568	0.191182
BTK,MET	-2.1637	0.300195	0.000217202	0.189767
ABL1,FLT3	-5.0575	0.277783	0.237171	0.188559
IGF1R,FGFR4	-4.48417	0.439374	0.295078	0.187421
BLK,EPHA7	-3.41442	0.245782	0.00462809	0.187087
LYN,ERBB2	-5.79366	0.478477	0.920096	0.186686
FGFR4,TXK	-4.82011	0.315603	0.355758	0.186486
HCK,SRMS	-3.92708	-0.131495	0.0609802	0.186219
YES1,TNK2	-6.62755	0.339741	1.02937	0.186086
SYK,CSF1R	-3.06419	0.144506	0.00432094	0.186086
FLT1,EPHA2	-2.36435	0.384778	4.34316e-05	0.185752
FES,TNK1	-5.16491	0.379059	0.596536	0.185686
EPHB6,TNK2	-4.29091	0.380623	0.728391	0.185486
INSRR,LCK	-4.75017	0.36215	0.427128	0.185153
JAK3,TYRO3	-4.97986	0.352362	0.23277	0.184754
MET,EPHB6	-2.74077	0.289143	0.00590291	0.184157
EPHB1,LCK	-5.18528	0.407494	0.13757	0.183891
EPHA8,EPHB1	-2.83592	0.0662455	0.00126128	0.183759
EPHA6,INSRR	-5.61843	0.0813886	0.453704	0.183162
RET,INSRR	-3.32343	0.0416363	0.316683	0.183096
LYN,INSRR	-5.3213	0.47282	0.554707	0.182831
FLT3,NTRK2	-4.66483	0.44408	0.343327	0.182369
MERTK,EPHA8	-4.73304	0.263323	0.36211	0.182369
CSF1R,EPHA1	-2.9335	-0.0695146	0.00788851	0.182302
BLK,DDR1	-2.1368	0.137576	8.68676e-05	0.181906
RET,FGFR4	-4.15619	-0.0148012	0.417482	0.18151
EPHB6,ERBB3	-3.51318	2.04092	0.0461437	0.181246
JAK3,FGFR1	-4.14132	0.269887	0.0112627	0.181049
FGR,NTRK2	-3.58093	0.48294	0.0176835	0.180851
KIT,MERTK	-6.8525	0.408717	1.46661	0.180851
JAK3,FGR	-5.03956	0.134016	0.603801	0.180522
AXL,FRK	-4.93014	0.69849	0.322576	0.180456
JAK1,LYN	-6.83788	0.24899	1.57757	0.180456
EPHB2,NTRK3	-2.98468	0.408188	0.0411495	0.180193
FGR,PTK2	-11.4918	0.320588	7	0.180127
ROS1,EPHB4	-4.91613	0.0835697	0.206279	0.180061
FES,PTK6	-6.13808	0.363081	1.45792	0.179996
EPHA1,PTK6	-4.11838	0.0239286	0.149599	0.17993
PDGFRA,EPHB2	-4.43614	0.148322	0.954286	0.179667
JAK3,EPHB3	-6.07394	0.448739	1.19866	0.179273
JAK2,SRC	-6.80364	0.0149432	1.4168	0.179273
CSK,FLT1	-3.29656	0.0977906	0.0430156	0.17888
ROS1,SRMS	-4.25451	0.377325	0.0602811	0.178683
FLT1,PTK2	-11.856	0.408627	7	0.178486
INSR,INSR	-3.89244	0.730883	0.18502	0.177897
EPHA7,NTRK1	-3.95328	0.329313	0.0423927	0.177505
FGR,EPHB3	-5.18578	0.281906	0.305483	0.177505
PDGFRA,TYRO3	-4.85288	0.332598	0.222936	0.17744
EPHB1,EPHB6	-3.39664	0.225272	0.0428718	0.176852
TYRO3,PTK6	-4.56894	0.17498	0.198665	0.176721
ABL1,NTRK1	-4.00352	0.276284	0.154964	0.17633
ROS1,ABL2	-7.27244	-0.00915545	1.67182	0.175809
EPHA4,TNK1	-3.28387	0.0677786	0.00278842	0.175744
YES1,DDR2	-6.39703	0.12383	0.57659	0.175484
NTRK2,NTRK2	-3.27242	0.480711	0.0141695	0.175419
FGR,FES	-5.55989	0.516338	0.659754	0.175224
ERBB2,NTRK1	-3.65687	0.426712	0.0146634	0.174964
ITK,TNK2	-4.77301	0.307853	0.320663	0.174899
TYK2,EPHB6	-4.23616	0.320801	0.118558	0.173407
YES1,FLT1	-6.49223	0.113034	0.720789	0.172695
JAK2,EPHA2	-1.64623	0.405355	8.68676e-05	0.172501
TXK,EPHA10	-4.25191	0.624807	0.108686	0.172308
JAK2,KIT	-5.06414	-0.0595766	0.87844	0.172243
KDR,AXL	-5.38618	0.254133	0.654234	0.171985
DDR1,FES	-4.37196	0.144944	0.255238	0.171985
HCK,INSRR	-4.19786	0.103821	0.0824945	0.171533
ROS1,BMX	-3.73842	0.343347	0.0651482	0.170761
EPHA10,EPHA5	-3.36497	0.165958	0.00126128	0.170761
DDR2,PTK2	-11.6591	0.507957	6.69897	0.170696
PDGFRA,BMX	-3.27701	-0.068707	0.225483	0.170696
IGF1R,BMX	-2.60295	0.783732	0.00278842	0.170568
ABL1,EPHA7	-3.91858	0.27829	0.0888957	0.170053
EPHA6,EPHB3	-7.53431	0.215606	2.53077	0.169411
SYK,SRC	-6.54122	0.489239	1.97716	0.169347
KIT,EPHB3	-6.34794	0.466295	1.66294	0.168706
TYRO3,TNK2	-4.6505	0.429305	0.339704	0.16813
KDR,WEE1	-9.2437	0.831784	2.90136	0.167811
KIT,AXL	-6.82109	0.167933	1.77521	0.167619
AXL,TNK1	-5.09654	0.157614	0.437231	0.167619
CSK,FYN	-4.02917	0.162983	0.109691	0.167108
IGF1R,NTRK2	-4.16201	0.385791	0.143271	0.166853
FGFR1,EPHB1	-2.74081	0.602185	0.000347575	0.166725
EPHA2,ROS1	-3.60815	0.0702741	0.0429197	0.166662
JAK3,SRMS	-3.50008	0.767815	0.00361969	0.166534
EPHB6,EPHB6	-3.01336	1.02489	0.0115302	0.16647
FES,ABL2	-7.39544	0.0688949	2.61137	0.165897
TNK1,PTK2	-10.964	0.332645	6.52288	0.16577
EPHA10,EPHB1	-3.07466	0.819095	0.00174066	0.165643
FGFR1,PDGFRA	-4.01967	0.259606	0.0964217	0.165643
[truncated: 1,006 more rows]
