# Supplementary material for: Combinatorial CRISPR screen reveals FYN and KDM4 as targets for synergistic drug combination for treating triple negative breast cancer
Source: eLife. 2025 Apr 17;13:RP93921. doi: 10.7554/eLife.93921 (PMC12005726; doi:10.7554/eLife.93921)
Supplement: Supplementary file 3. [file elife-93921-supp3.xlsx]

## Sheet: Sheet1
Target gene	Sequence
GFP (neg. con)	GGGCGAGGAGCTGTTCACCG
CCR5 (neg. con)	CATTAAAGATAGTCATCTTG
IGF1R	GGTACAATGTGAAAGGCCGA
EGFR	TGTCACCACATAATTACCTG
FYN #1	TGGATACTACATTACCACCCs
FYN #2	TGTGACAGGGAACTACTAGG
FYN #3	GTCCCCCGAATCATTCCTTG
BTK	TATGAGTATGACTTTGAACG
ITK	AACTATCACCAACATAATGG
PTK6	CGCACCCGACAGGACGTAGT
PDGFRA	AAATAATCCGTCATTCCTAG
KDM5A	GCTGGGATTCAAATAACTCG
KDM5B	TCTTGCAGATCATCTCATCG
KDM6A #1	CAATTGTCAGAAGTATTCTG
KDM6A #2	CTAGCAATTCAGTAACACAG
KDM6B #1	GGTGCTAGAAGAGATCAGCC
KDM6B #2	GCAGTCGGAAACCGTTCTTG
KDM4A	TGTGCACAGTTATGCCAAAG
KDM4B	TCACCAGGTACTGTACCCCG
KDM4C	GCAAGAGTATAATGCAACAG
KDM4D	AAATCGGTGAATTATAGATG
KDM3A	CATTCTGTAAGAGCGAAATG
KDM3B	GGATGGGTCATGCATCAATG
KDM3C	TTGGCATTACATCACGACGC
PHF8	AGGGGCATGATACACACAAG
