# Supplementary material for: Combinatorial CRISPR screen reveals FYN and KDM4 as targets for synergistic drug combination for treating triple negative breast cancer
Source: eLife. 2025 Apr 17;13:RP93921. doi: 10.7554/eLife.93921 (PMC12005726; doi:10.7554/eLife.93921)
Supplement: Supplementary file 4. [file elife-93921-supp4.xlsx]

## Sheet: Sheet1
Figure	Disease	Treatment	GEO accession number
5B	LUAD	osimertinib	GSE193258
5H	BRCA	Lapatinib	GSE155341
	COAD	Irinotecan	GSE145356
	PAAD	gemcitabine	GSE189764
	HGSOC	carboplatin	GSE198701
5I	BRCA	Epirubicin+docetaxel+bevacizumab	GSE87455
	ESCA	CROSS+atezolizumab	GSE165252
	COAD	radiotherapy	GSE15781
